# Supplementary material for: Cocirculation of Swine H1N1 Influenza A Virus Lineages in Germany
Source: MDPI journal article supplement (doi:10.3390/v12070762), 2020-07-15

# Suppl. Fig. 5C

## lineage

1A

Papenburg/2010-like  
swH2<sub>pdm</sub>N1

Ca1:  
I183V  
Ca2:  
K159R  
Sa:  
G172E  
Sb:  
S202N, D204S

Wachstum/2014-like  
swH1<sub>pdm</sub>N1<sub>pdm</sub>

Ca1:  
D185N  
Ca2:  
K159S, D239N  
Sa:  
P141T, N142D, G172T, N173D, S179N, K180I  
Sb:  
S202A, S207R

NxT<sub>295</sub>

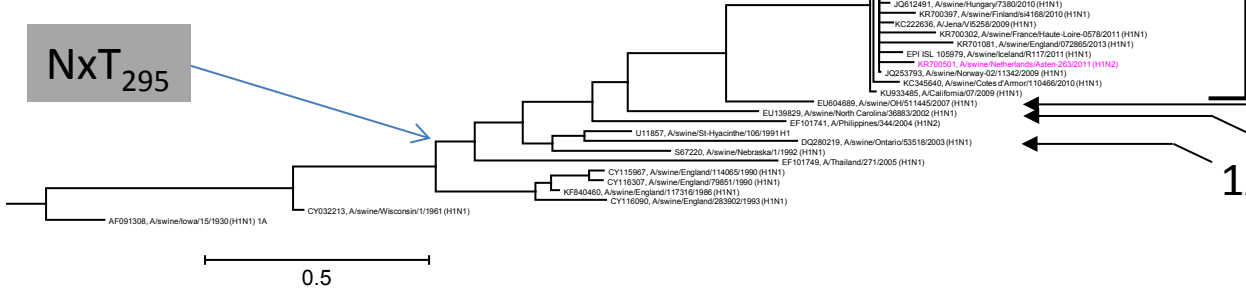

1A.3.3.2

1A.3.3.3 (γ)  
1A.2 (β)  
1A.1 (α)

Ca1

Ca2

Cb

Sa

Sb

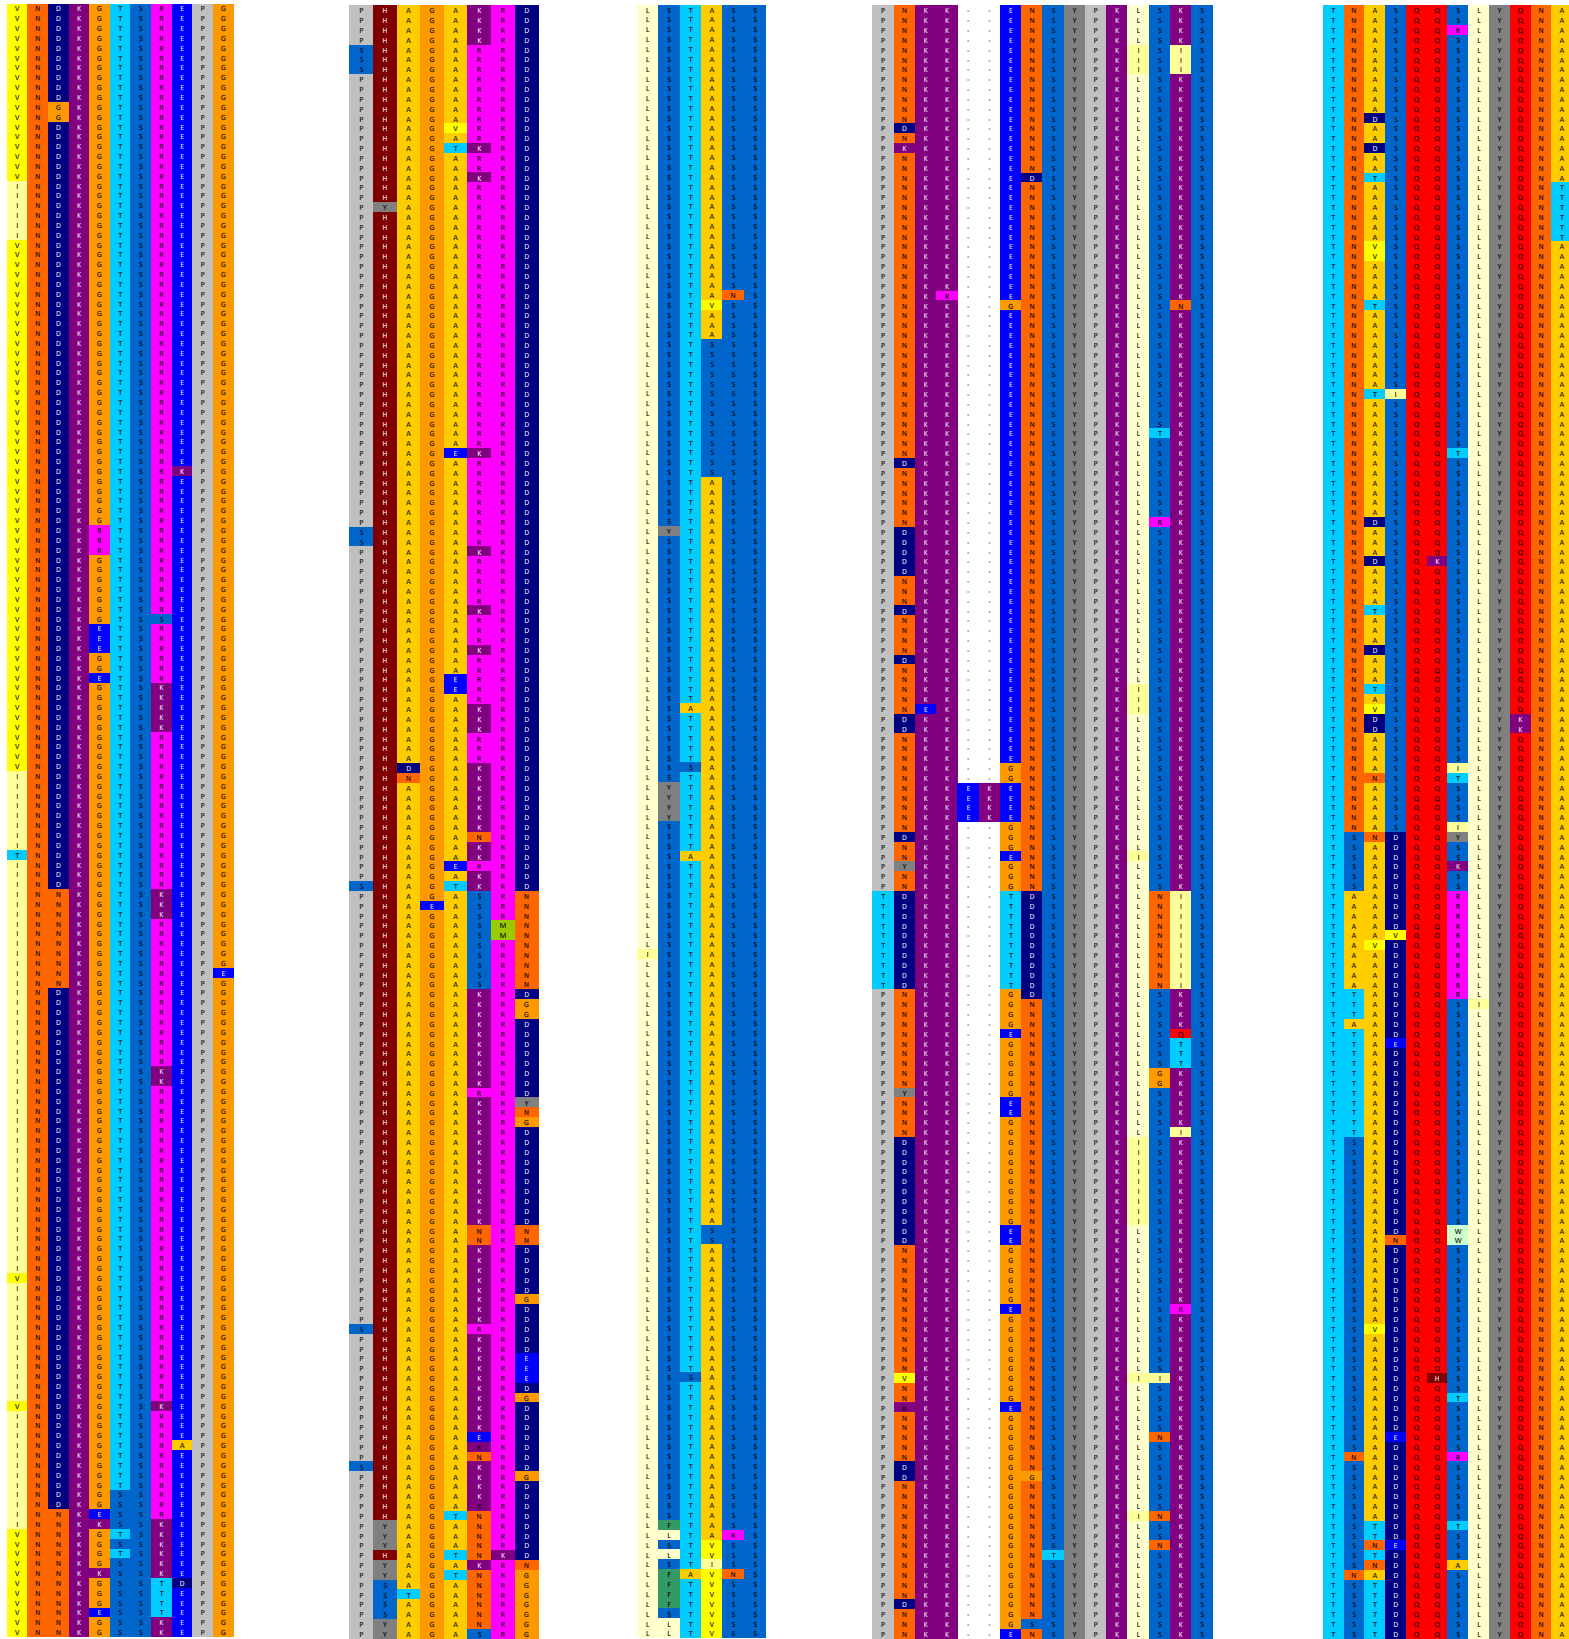

Supplement: s1 [file s1]
