# Supplementary material for: Cocirculation of Swine H1N1 Influenza A Virus Lineages in Germany
Source: MDPI journal article supplement (doi:10.3390/v12070762), 2020-07-15
Supplement: s1 [file s1]

Supplementary Table 1: Virus strains, country, sampling dates and GenBank accession numbers

| Strain                                       |                | Sampling date | Seg. 1, Pol PB2 | Seg. 2, Pol PB1 | Seg. 3, Pol PA | Seg. 4, HA | Seg. 5, NP | Seg. 6, NA | Seg. 7, M | Seg. 8, NS |
|----------------------------------------------|----------------|---------------|-----------------|-----------------|----------------|------------|------------|------------|-----------|------------|
| A/swine/Amsberg/1/1979 (H1N1)                | Germany        | 1979          | KJ889297        | KJ889298        | KJ889299       | KJ889300   | KJ889301   | KJ889302   | KJ889303  | KJ889304   |
| A/swine/Amsberg/6554/1979 (H1N1)             | Germany        | 1979          | KJ889305        | KJ889306        | KJ889307       | KJ889308   | KJ889309   | KJ889310   | KJ889311  | KJ889312   |
| A/swine/Netherlands/25/1980 (H1N1)           | Netherlands    | 1980          | KJ889321        | KJ889322        | KJ889323       | KJ889324   | KJ889325   | KJ889326   | KJ889327  | KJ889328   |
| A/swine/Marseille/2260/1980 (H1N1)           | France         | 1980          | KJ889313        | KJ889314        | KJ889315       | KJ889316   | KJ889317   | KJ889318   | KJ889319  | KJ889320   |
| A/swine/Amsberg/3/1981 (H1N1)                | Germany        | 1981          | KJ889329        | KJ889330        | KJ889331       | KJ889332   | KJ889333   | KJ889334   | KJ889335  | KJ889336   |
| A/swine/Amsberg/4/1981 (H1N1)                | Germany        | 1981          | KJ889337        | KJ889338        | KJ889339       | KJ889340   | KJ889341   | KJ889342   | KJ889343  | KJ889344   |
| A/swine/Amsberg/7/1981 (H1N1)                | Germany        | 1981          | KJ889345        | KJ889346        | KJ889347       | KJ889348   | KJ889349   | KJ889350   | KJ889351  | KJ889352   |
| A/swine/Germany/S27/1981 (H1N1)              | Germany        | 1981          | KJ889361        | KJ889362        | KJ889363       | KJ889364   | KJ889365   | KJ889366   | KJ889367  | KJ889368   |
| A/swine/Potsdam/1/1981 (H1N1)                | Germany        | 1981          | KJ889376        | KJ889377        | KJ889378       | KJ889379   | KJ889380   | KJ889381   | EU478796  | KJ889382   |
| A/swine/Potsdam/15/1981 (H1N1)               | Germany        | 1981          | KJ889383        | DQ836174        | KJ889384       | KJ889385   | KJ889386   | KJ889387   | DQ186973  | KJ889388   |
| A/swine/Potsdam/268/1981 (H1N1)              | Germany        | 1981          | KJ889389        | KJ889390        | KJ889391       | KJ889392   | KJ889393   | KJ889394   | EU478797  | KJ889395   |
| A/swine/Hannover/1/1981 (H1N1)               | Germany        | 1981          | KJ889369        | KJ889370        | KJ889371       | KJ889372   | KJ889373   | KJ889374   | EU478795  | KJ889375   |
| A/swine/Italy/V147/1981 (H1N1)               | Italy          | 1981          | KJ889396        | KJ889397        | KJ889398       | KJ889399   | KJ889400   | KJ889401   | KJ889402  | KJ889403   |
| A/swine/Germany/2/1981 (H1N1)                | Germany        | 1981          | KJ889353        | KJ889354        | KJ889355       | KJ889356   | KJ889357   | KJ889358   | KJ889359  | KJ889360   |
| A/swine/Italy/147/1981 (H1N1)                | Italy          | 1981          | KJ889404        | KJ889405        | KJ889406       | KJ889407   | KJ889408   | KJ889409   | KJ889410  | KJ889411   |
| A/swine/England/117316/1986 (H1N1)           | United Kingdom | 1986          | KF840457        | KF840458        | KF840459       | KF840460   | KF840461   | KF840462   | KF840463  | KF840464   |
| A/swine/Schwerin/103/1989 (H1N1)             | Germany        | 1989          | MK364805        | DQ836175        | MK364806       | MK364807   | MK364808   | MK364809   | DQ186974  | MK364810   |
| A/swine/Gent/V230/1992 (H1N1)                | Belgium        | 1992          | MK364811        | MK364812        | MK364813       | MK364814   | MK364815   | MK364816   | EU487799  | MK364817   |
| A/swine/Bakum/5/1995 (H1N1)                  | Germany        | 1995          | MK364818        | DQ836176        | MK364819       | MK364820   | MK364821   | MK364822   | DQ186975  | MK364823   |
| A/swine/Bakum/3543/1998 (H1N1)               | Germany        | 1998          | MK364824        | MK364825        | MK364826       | MK364827   | MK364828   | MK364829   | MK364830  | MK364831   |
| A/swine/Belzig/2/2001 (H1N1)                 | Germany        | 2001          | MK364832        | DQ836177        | MK364833       | MK364834   | MK364835   | MK364836   | DQ186976  | MK364837   |
| A/swine/Haselünne/IDT2617-Pass1/2003 (H1N1)  | Germany        | 09-Oct-2003   | GQ161116        | GQ161117        | GQ161118       | GQ161119   | GQ161120   | GQ161121   | GQ161122  | GQ161123   |
| A/swine/Haselünne/IDT2617-Pass20/2003 (H1N1) | Germany        | 09-Oct-2003   | GQ161109        | GQ161110        | GQ161111       | GQ161112   | GQ161113   | GQ161114   | EU478811  | GQ161115   |
| A/swine/Vechta/IDT2623/2003 (H1N1)           | Germany        | 10-Oct-2003   | MK364838        | MK364839        | MK364840       | MK364841   | MK364842   | MK364843   | EU478817  | MK364844   |
| A/swine/Geldern/IDT2888/2004 (H1N1)          | Germany        | 06-Jan-2004   | MK364845        | MK364846        | MK364847       | MK364848   | MK364849   | MK364850   | EU478821  | MK364851   |
| A/swine/Greven/IDT2889/2004 (H1N1)           | Germany        | 05-Jan-2004   | GQ161153        | GQ161154        | GQ161155       | GQ161156   | GQ161157   | GQ161158   | EU478823  | GQ161159   |
| A/swine/Gablingen/2998/2004 (H1N1)           | Germany        | 26-Feb-2004   | MK364852        | MK364853        | MK364854       | MK364855   | MK364856   | MK364857   | MK364858  | MK364859   |
| A/swine/Beienrode/3053/2004 (H1N1)           | Germany        | 29-Mar-2004   | MK364860        | MK364861        | MK364862       | MK364863   | MK364864   | MK364865   | MK364866  | MK364867   |
| A/swine/Kneheim/3066/2004 (H1N1)             | Germany        | 05-Apr-2004   | MK364868        | MK364869        | MK364870       | MK364871   | MK364872   | MK364873   | MK364874  | MK364875   |
| A/swine/Laer/IDT3893/2005 (H1N1)             | Germany        | 15-Feb-2005   | MK364876        | MK364877        | MK364878       | MK364879   | MK364880   | MK364881   | EU478837  | MK364882   |
| A/swine/Wohnste/IDT4093/2005 (H1N1)          | Germany        | 27-Apr-2005   | MK364883        | MK364884        | MK364885       | MK364886   | MK364887   | MK364888   | EU478845  | MK364889   |
| A/swine/Voglar/IDT4096/2005 (H1N1)           | Germany        | 09-May-2005   | MK364890        | MK364891        | MK364892       | MK364893   | MK364894   | MK364895   | EU478844  | MK364896   |
| A/swine/Hemmingen/IDT4097/2005 (H1N1)        | Germany        | 09-May-2005   | MK364897        | MK364898        | MK364899       | MK364900   | MK364901   | MK364902   | EU478834  | MK364903   |
| A/swine/Kroge/IDT4192/2005 (H1N1)            | Germany        | 17-Jun-2005   | MK364904        | MK364905        | MK364906       | MK364907   | MK364908   | MK364909   | EU478836  | MK364910   |
| A/swine/Rheda-Wiedenbrück/4205/2005 (H1N1)   | Germany        | 22-Jun-2005   | MK364911        | MK364912        | MK364913       | MK364914   | MK364915   | MK364916   | MK364917  | MK364918   |
| A/swine/Passau/4207/2005 (H1N1)              | Germany        | 22-Jun-2005   | MK364919        | MK364920        | MK364921       | MK364922   | MK364923   | MK364924   | MK364925  | MK364926   |
| A/swine/Bad Rothenfelde/4255/2005 (H1N1)     | Germany        | 05-Jul-2005   | MK364927        | MK364928        | MK364929       | MK364930   | MK364931   | MK364932   | MK364933  | MK364934   |
| A/swine/Oldinghausen/4256/2005 (H1N1)        | Germany        | 05-Jul-2005   | MK364935        | MK364936        | MK364937       | MK364938   | MK364939   | MK364940   | MK364941  | MK364942   |
| A/swine/Nordhorn/4277/2005 (H1N1)            | Germany        | 12-Jul-2005   | MK364943        | MK364944        | MK364945       | MK364946   | MK364947   | MK364948   | MK364949  | MK364950   |
| A/swine/Zellarn/4287/2005 (H1N1)             | Germany        | 13-Jul-2005   | MK364951        | MK364952        | MK364953       | MK364954   | MK364955   | MK364956   | MK364957  | MK364958   |
| A/swine/Wenzendorf/4353/2005 (H1N1)          | Germany        | 08-Aug-2005   | MK364959        | MK364960        | MK364961       | MK364962   | MK364963   | MK364964   | MK364965  | MK364966   |
| A/swine/Großharrie/4372/2005 (H1N1)          | Germany        | 16-Aug-2005   | MK364967        | MK364968        | MK364969       | MK364970   | MK364971   | MK364972   | MK364973  | MK364974   |
| A/swine/Bocholt/4414/2005 (H1N1)             | Germany        | 30-Aug-2005   | MK364975        | MK364976        | MK364977       | MK364978   | MK364979   | MK364980   | MK364981  | MK364982   |
| A/swine/Osnabrück/4440/2005 (H1N1)           | Germany        | 06-Sep-2005   | MK364983        | MK364984        | MK364985       | MK364986   | MK364987   | MK364988   | MK364989  | MK364990   |
| A/swine/Haren/4509/2005 (H1N1)               | Germany        | 28-Sep-2005   | MK364991        | MK364992        | MK364993       | MK364994   | MK364995   | MK364996   | MK364997  | MK364998   |
| A/swine/Rothalmsünster/4564/2005 (H1N1)      | Germany        | 14-Oct-2005   | MK364999        | MK365000        | MK365001       | MK365002   | MK365003   | MK365004   | MK365005  | MK365006   |
| A/swine/Wenzendorf/4584/2005 (H1N1)          | Germany        | 17-Oct-2005   | MK365007        | MK365008        | MK365009       | MK365010   | MK365011   | MK365012   | MK365013  | MK365014   |
| A/swine/Visbek/4656/2005 (H1N1)              | Germany        | 09-Nov-2005   | MK365015        | MK365016        | MK365017       | MK365018   | MK365019   | MK365020   | MK365021  | MK365022   |
| A/swine/Krerensen/4662/2005 (H1N1)           | Germany        | 14-Nov-2005   | MK365023        | MK365024        | MK365025       | MK365026   | MK365027   | MK365028   | MK365029  | MK365030   |
| A/swine/Hemmoor/4674/2005 (H1N1)             | Germany        | 21-Nov-2005   | MK365031        | MK365032        | MK365033       | MK365034   | MK365035   | MK365036   | MK365037  | MK365038   |
| A/swine/Haselünne/4709/2005 (H1N1)           | Germany        | 30-Nov-2005   | MK365039        | MK365040        | MK365041       | MK365042   | MK365043   | MK365044   | MK365045  | MK365046   |
| A/swine/Engelsberg/4721/2005 (H1N1)          | Germany        | 05-Dec-2005   | MK365047        | MK365048        | MK365049       | MK365050   | MK365051   | MK365052   | MK365053  | MK365054   |

|                                           |         |             |          |          |          |          |          |          |          |          |
|-------------------------------------------|---------|-------------|----------|----------|----------|----------|----------|----------|----------|----------|
| A/swine/Laar/4772/2005 (H1N1)             | Germany | 14-Dec-2005 | MK365055 | MK365056 | MK365057 | MK365058 | MK365059 | MK365060 | MK365061 | MK365062 |
| A/swine/Brakel/4806/2006 (H1N1)           | Germany | 23-Dec-2005 | MK365063 | MK365064 | MK365065 | MK365066 | MK365067 | MK365068 | MK365069 | MK365070 |
| A/swine/Günne/4847/2006 (H1N1)            | Germany | 12-Jan-2006 | MK365071 | MK365072 | MK365073 | MK365074 | MK365075 | MK365076 | MK365077 | MK365078 |
| A/swine/Ense/4848/2006 (H1N1)             | Germany | 12-Jan-2006 | MK365079 | MK365080 | MK365081 | MK365082 | MK365083 | MK365084 | MK365085 | MK365086 |
| A/swine/Meppen/4919/2006 (H1N1)           | Germany | 31-Jan-2006 | MK365087 | MK365088 | MK365089 | MK365090 | MK365091 | MK365092 | MK365093 | MK365094 |
| A/swine/Melle/5003/2006 (H1N1)            | Germany | 20-Feb-2006 | MK365095 | MK365096 | MK365097 | MK365098 | MK365099 | MK365100 | MK365101 | MK365102 |
| A/swine/Lichtenau/5045/2006 (H1N1)        | Germany | 07-Mar-2006 | MK365103 | MK365104 | MK365105 | MK365106 | MK365107 | MK365108 | MK365109 | MK365110 |
| A/swine/Nordkirchen /5062/2006 (H1N1)     | Germany | 10-Mar-2006 | MK365111 | MK365112 | MK365113 | MK365114 | MK365115 | MK365116 | MK365117 | MK365118 |
| A/swine/Holzheim/5102/2006 (H1N1)         | Germany | 22-Mar-2006 | MK365119 | MK365120 | MK365121 | MK365122 | MK365123 | MK365124 | MK365125 | MK365126 |
| A/swine/Steinhorst/5129/2006 (H1N1)       | Germany | 04-Apr-2006 | MK365127 | MK365128 | MK365129 | MK365130 | MK360131 | MK365132 | MK365133 | MK365134 |
| A/swine/Ortensburg/5144/2006 (H1N1)       | Germany | 10-Apr-2006 | MK365135 | MK365136 | MK365137 | MK365138 | MK365139 | MK365140 | MK365141 | MK365142 |
| A/swine/Südlohn/5508/2006 (H1N1)          | Germany | 30-Aug-2006 | MK365143 | MK365144 | MK365145 | MK365146 | MK365147 | MK365148 | MK365149 | MK365150 |
| A/swine/Bocholt/5533/2006 (H1N1)          | Germany | 05-Sep-2006 | MK365151 | MK365152 | MK365153 | MK365154 | MK365155 | MK365156 | MK365157 | MK365158 |
| A/swine/Ramsberg/5544/2006 (H1N1)         | Germany | 11-Sep-2006 | MK365159 | MK365160 | MK365161 | MK365162 | MK365163 | MK365164 | MK365165 | MK365166 |
| A/swine/Friesoythe/5548/2006 (H1N1)       | Germany | 11-Sep-2006 | MK365167 | MK365168 | MK365169 | MK365170 | MK365171 | MK365172 | MK365173 | MK365174 |
| A/swine/Friesoythe/5549/2006 (H1N1)       | Germany | 11-Sep-2006 | MK365175 | MK365176 | MK365177 | MK365178 | MK365179 | MK365180 | MK365181 | MK365182 |
| A/swine/Kassel/5550/2006 (H1N1)           | Germany | 13-Sep-2006 | MK365183 | MK365184 | MK365185 | MK365186 | MK365187 | MK365188 | MK365189 | MK365190 |
| A/swine/Altenaffeln/5551/2006 (H1N1)      | Germany | 15-Sep-2006 | MK365191 | MK365192 | MK365193 | MK365194 | MK365195 | MK365196 | MK365197 | MK365198 |
| A/swine/Ostercappeln/5553/2006 (H1N1)     | Germany | 20-Sep-2006 | MK365199 | MK365200 | MK365201 | MK365202 | MK365203 | MK365204 | MK365205 | MK365206 |
| A/swine/Balve/5603/2006 (H1N1)            | Germany | 16-Oct-2006 | MK365207 | MK365208 | MK365209 | MK365210 | MK365211 | MK365212 | MK365213 | MK365214 |
| A/swine/Bad Griesbach/IDT5604/2006 (H1N1) | Germany | 17-Oct-2006 | MK365215 | MK365216 | MK365217 | MK365218 | MK365219 | MK365220 | EU478846 | MK365221 |
| A/swine/Gütersloh/5610/2006(H1N1)         | Germany | 17-Oct-2006 | MK365222 | MK365223 | MK365224 | MK365225 | MK365226 | MK365227 | MK365228 | MK365229 |
| A/swine/Roththamünster/5616/2006 (H1N1)   | Germany | 23-Oct-2006 | MK365230 | MK365231 | MK365232 | MK365233 | MK365234 | MK365235 | MK365236 | MK365237 |
| A/swine/Feldbach/5625/2006 (H1N1)         | Austria | 22-Oct-2006 | MK365238 | MK365239 | MK365240 | MK365241 | MK365242 | MK365243 | MK365244 | MK365245 |
| A/swine/Schloß Holte/5647/2006 (H1N1)     | Germany | 06-Nov-2006 | MK365246 | MK365247 | MK365248 | MK365249 | MK365250 | MK365251 | MK365252 | MK365253 |
| A/swine/Nordhorn/5657/2006 (H1N1)         | Germany | 03-Nov-2006 | MK365254 | MK365255 | MK365256 | MK365257 | MK365258 | MK365259 | MK365260 | MK365261 |
| A/swine/Gotfrieding/5732/2006 (H1N1)      | Germany | 26-Nov-2006 | MK365262 | MK365263 | MK365264 | MK365265 | MK365266 | MK365267 | MK365268 | MK365269 |
| A/swine/Borgholzhausen/5751/2006 (H1N1)   | Germany | 04-Dec-2006 | MK365270 | MK365271 | MK365272 | MK365273 | MK365274 | MK365275 | MK365276 | MK365277 |
| A/swine/Wadersloh/5761/2006 (H1N1)        | Germany | 06-Dec-2006 | MK365278 | MK365279 | MK365280 | MK365281 | MK365282 | MK365283 | MK365284 | MK365285 |
| A/swine/Ennigerloh/IDT5803/2006 (H1N1)    | Germany | 13-Dec-2006 | MK365286 | MK365287 | MK365288 | GQ161139 | MK365289 | GQ161140 | MK365290 | MK365291 |
| A/swine/Geske/6004/2007 (H1N1)            | Germany | 15-Mar-2007 | MK365292 | MK365293 | MK365294 | MK365295 | MK365296 | MK365297 | MK365298 | MK365299 |
| A/swine/Bad Wünnenberg/6005/2007 (H1N1)   | Germany | 19-Mar-2007 | MK365300 | MK365301 | MK365302 | MK365303 | MK365304 | MK365305 | MK365306 | MK365307 |
| A/swine/Bielefeld/6033/2007 (H1N1)        | Germany | 26-Mar-2007 | MK365308 | MK365309 | MK365310 | MK365311 | MK365312 | MK365313 | MK365314 | MK365315 |
| A/swine/Schmallenberg/6049/2007 (H1N1)    | Germany | 03-Apr-2007 | MK365316 | MK365317 | MK365318 | MK365319 | MK365320 | MK365321 | MK365322 | MK365323 |
| A/swine/Fronhausen/6059/2007 (H1N1)       | Germany | 12-Apr-2007 | MK365324 | MK365325 | MK365326 | MK365327 | MK365328 | MK365329 | MK365330 | MK365331 |
| A/swine/Feldbach/6072/2007 (H1N1)         | Austria | 15-Apr-2007 | MK365332 | MK365333 | MK365334 | MK365335 | MK365336 | MK365337 | MK365338 | MK365339 |
| A/swine/Wülknitz/6141/2007 (H1N1)         | Germany | 11-May-2007 | MK365340 | MK365341 | MK365342 | MK365343 | MK365344 | MK365345 | MK365346 | MK365347 |
| A/swine/Nordkirchen/6167/2007 (H1N1)      | Germany | 16-May-2007 | MK365348 | MK365349 | MK365350 | MK365351 | MK365352 | MK365353 | MK365354 | MK365355 |
| A/swine/Lippetal/6292/2007 (H1N1)         | Germany | 17-Jul-2007 | MK365356 | MK365357 | MK365358 | MK365359 | MK365360 | MK365361 | MK365362 | MK365363 |
| A/swine/Marsberg/6307/2007 (H1N1)         | Germany | 24-Jul-2007 | MK365364 | MK365365 | MK365366 | MK365367 | MK365368 | MK365369 | MK365370 | MK365371 |
| A/swine/Schapen/6332/2007 (H1N1)          | Germany | 08-Aug-2007 | MK365372 | MK365373 | MK365374 | MK365375 | MK365376 | MK365377 | MK365378 | MK365379 |
| A/swine/Borgholzhausen/6371/2007 (H1N1)   | Germany | 17-Aug-2007 | MK365380 | MK365381 | MK365382 | MK365383 | MK365384 | MK365385 | MK365386 | MK365387 |
| A/swine/Paderborn/6373/2007 (H1N1)        | Germany | 21-Aug-2007 | MK365388 | MK365389 | MK365390 | MK365391 | MK365392 | MK365393 | MK365394 | MK365395 |
| A/swine/Daseburg/6531/2007 (H1N1)         | Germany | 09-Oct-2007 | MK365396 | MK365397 | MK365398 | MK365399 | MK365400 | MK365401 | MK365402 | MK365403 |
| A/swine/Bosel/6543/2007 (H1N1)            | Germany | 11-Oct-2007 | MK365404 | MK365405 | MK365406 | MK365407 | MK365408 | MK365409 | MK365410 | MK365411 |
| A/swine/Bad Rothenfelde/6622/2007 (H1N1)  | Germany | 06-Nov-2007 | MK365412 | MK365413 | MK365414 | MK365415 | MK365416 | MK365417 | MK365418 | MK365419 |
| A/swine/Sundern/6655a/2007 (H1N1)         | Germany | 22-Nov-2007 | MK365420 | MK365421 | MK365422 | MK365423 | MK365424 | MK365425 | MK365426 | MK365427 |
| A/swine/Brakel/6672/2007 (H1N1)           | Germany | 27-Nov-2007 | MK365428 | MK365429 | MK365430 | MK365431 | MK365432 | MK365433 | MK365434 | MK365435 |
| A/swine/Aisfeld/6673/2007 (H1N1)          | Germany | 28-Nov-2007 | MK365436 | MK365437 | MK365438 | MK365439 | MK365440 | MK365441 | MK365442 | MK365443 |
| A/swine/Everswinkel/6774/2008 (H1N1)      | Germany | 15-Jan-2008 | MK365444 | MK365445 | MK365446 | MK365447 | MK365448 | MK365449 | MK365450 | MK365451 |
| A/swine/Minden-Lübbecke/6810/2008 (H1N1)  | Germany | 28-Jan-2008 | MK365452 | MK365453 | MK365454 | MK365455 | MK365456 | MK365457 | MK365458 | MK365459 |
| A/swine/Steinau/6818/2008 (H1N1)          | Germany | 31-Jan-2008 | MK365460 | MK365461 | MK365462 | MK365463 | MK365464 | MK365465 | MK365466 | MK365467 |
| A/swine/Emtlinghausen/6821/2008 (H1N1)    | Germany | 28-Jan-2008 | MK365468 | MK365469 | MK365470 | MK365471 | MK365472 | MK365473 | MK365474 | MK365475 |
| A/swine/Hornstorf/6849/2008 (H1N1)        | Germany | 12-Feb-2008 | MK365476 | MK365477 | MK365478 | MK365479 | MK365480 | MK365481 | MK365482 | MK365483 |
| A/swine/Soest/6948/2008 (H1N1)            | Germany | 12-Mar-2008 | MK365484 | MK365485 | MK365486 | MK365487 | MK365488 | MK365489 | MK365490 | MK365491 |
| A/swine/Vreden/6986/2008 (H1N1)           | Germany | 31-Mar-2008 | MK365492 | MK365493 | MK365494 | MK365495 | MK365496 | MK365497 | MK365498 | MK365499 |

|                                        |         |             |          |          |          |          |          |          |          |          |
|----------------------------------------|---------|-------------|----------|----------|----------|----------|----------|----------|----------|----------|
| A/swine/Twistringen/6991/2008 (H1N1)   | Germany | 03-Apr-2008 | MK365500 | MK365501 | MK365502 | MK365503 | MK365504 | MK365505 | MK365506 | MK365507 |
| A/swine/Twistringen/7029/2008 (H1N1)   | Germany | 15-Apr-2008 | MK365508 | MK365509 | MK365510 | MK365511 | MK365512 | MK365513 | MK365514 | MK365515 |
| A/swine/Hornberg/7039/2008 (H1N1)      | Germany | 22-Apr-2008 | MK365516 | MK365517 | MK365518 | MK365519 | MK365520 | MK365521 | MK365522 | MK365523 |
| A/swine/Twistringen/7044/2008 (H1N1)   | Germany | 22-Apr-2008 | MK365524 | MK365525 | MK365526 | MK365527 | MK365528 | MK365529 | MK365530 | MK365531 |
| A/swine/Heiden/7064/2008 (H1N1)        | Germany | 30-Apr-2008 | MK365532 | MK365533 | MK365534 | MK365535 | MK365536 | MK365537 | MK365538 | MK365539 |
| A/swine/Uelzen/7066/2008 (H1N1)        | Germany | 25-Apr-2008 | MK365540 | MK365541 | MK365542 | MK365543 | MK365544 | MK365545 | MK365546 | MK365547 |
| A/swine/Klosterseele/7129/2008 (H1N1)  | Germany | 29-May-2008 | MK365548 | MK365549 | MK365550 | MK365551 | MK365552 | MK365553 | MK365554 | MK365555 |
| A/swine/Dinklage/7240/2008 (H1N1)      | Germany | 09-Jul-2008 | MK365556 | MK365557 | MK365558 | MK365559 | MK365560 | MK365561 | MK365562 | MK365563 |
| A/swine/Brakel/7488a/2008 (H1N1)       | Germany | 02-Sep-2008 | MK365564 | MK365565 | MK365566 | MK365567 | MK365568 | MK365569 | MK365570 | MK365571 |
| A/swine/Horneburg/7489/2008 (H1N1)     | Germany | 01-Sep-2008 | MK365572 | MK365573 | MK365574 | MK365575 | MK365576 | MK365577 | MK365578 | MK365579 |
| A/swine/Harsefeld/7490/2008 (H1N1)     | Germany | 27-Aug-2008 | MK365580 | MK365581 | MK365582 | MK365583 | MK365584 | MK365585 | MK365586 | MK365587 |
| A/swine/Malching/7497/2008 (H1N1)      | Germany | 03-Sep-2008 | MK365588 | MK365589 | MK365590 | MK365591 | MK365592 | MK365593 | MK365594 | MK365595 |
| A/swine/Pocking/7498/2008 (H1N1)       | Germany | 03-Sep-2008 | MK365596 | MK365597 | MK365598 | MK365599 | MK365600 | MK365601 | MK365602 | MK365603 |
| A/swine/Meppen/7555/2008 (H1N1)        | Germany | 15-Sep-2008 | MK365604 | MK365605 | MK365606 | MK365607 | MK365608 | MK365609 | MK365610 | MK365611 |
| A/swine/Melle/7590/2008 (H1N1)         | Germany | 24-Sep-2008 | MK365612 | MK365613 | MK365614 | MK365615 | MK365616 | MK365617 | MK365618 | MK365619 |
| A/swine/Spenge/7616/2008 (H1N1)        | Germany | 30-Sep-2008 | MK365620 | MK365621 | MK365622 | MK365623 | MK365624 | MK365625 | MK365626 | MK365627 |
| A/swine/Döttingen/7655/2008 (H1N1)     | Germany | 06-Oct-2008 | MK365628 | MK365629 | MK365630 | MK365631 | MK365632 | MK365633 | MK365634 | MK365635 |
| A/swine/Diemelstadt/7814/2008 (H1N1)   | Germany | 24-Oct-2008 | MK365636 | MK365637 | MK365638 | MK365639 | MK365640 | MK365641 | MK365642 | MK365643 |
| A/swine/Melle/7831/2008 (H1N1)         | Germany | 27-Oct-2008 | MK365644 | MK365645 | MK365646 | MK365647 | MK365648 | MK365649 | MK365650 | MK365651 |
| A/swine/Wetschen/7847/2008 (H1N1)      | Germany | 27-Oct-2008 | MK365652 | MK365653 | MK365654 | MK365655 | MK365656 | MK365657 | MK365658 | MK365659 |
| A/swine/Emstek/8155/2008 (H1N1)        | Germany | 01-Dec-2008 | MK365660 | MK365661 | MK365662 | MK365663 | MK365664 | MK365665 | MK365666 | MK365667 |
| A/swine/Ereren/8297a/2008 (H1N1)       | Germany | 10-Dec-2008 | MK365668 | MK365669 | MK365670 | MK365671 | MK365672 | MK365673 | MK365674 | MK365675 |
| A/swine/Poland/71/2008 (H1N1)          | Poland  | 2008        | MK365676 | MK365677 | MK365678 | MK365679 | MK365680 | MK365681 | MK365682 | MK365683 |
| A/swine/Wittmund/8498/2009 (H1N1)      | Germany | 12-Jan-2009 | MK365684 | MK365685 | MK365686 | MK365687 | MK365688 | MK365689 | MK365690 | MK365691 |
| A/swine/Feldbach/8647/2009 (H1N1)      | Austria | 22-Jan-2009 | MK365692 | MK365693 | MK365694 | MK365695 | MK365696 | MK365697 | MK365698 | MK365699 |
| A/swine/Berge/8685/2009 (H1N1)         | Germany | 27-Jan-2009 | MK365700 | MK365701 | MK365702 | MK365703 | MK365704 | MK365705 | MK365706 | MK365707 |
| A/swine/Emtlinghausen/8705/2009 (H1N1) | Germany | 28-Jan-2009 | MK365708 | MK365709 | MK365710 | MK365711 | MK365712 | MK365713 | MK365714 | MK365715 |
| A/swine/Gütersloh/8724a/2009 (H1N1)    | Germany | 03-Feb-2009 | MK365716 | MK365717 | MK365718 | MK365719 | MK365720 | MK365721 | MK365722 | MK365723 |
| A/swine/Heinsberg/8905/2009 (H1N1)     | Germany | 18-Feb-2009 | MK365724 | MK365725 | MK365726 | MK365727 | MK365728 | MK365729 | MK365730 | MK365731 |
| A/swine/Cloppenburg/8967a/2009 (H1N1)  | Germany | 23-Feb-2009 | MK365732 | MK365733 | MK365734 | MK365735 | MK365736 | MK365737 | MK365738 | MK365739 |
| A/swine/Bartenshagen/9002/2009 (H1N1)  | Germany | 26-Feb-2009 | MK365740 | MK365741 | MK365742 | MK365743 | MK365744 | MK365745 | MK365746 | MK365747 |
| A/swine/Enger/9149/2009 (H1N1)         | Germany | 11-Mar-2009 | MK365748 | MK365749 | MK365750 | MK365751 | MK365752 | MK365753 | MK365754 | MK365755 |
| A/swine/Neudörpen/9185/2009 (H1N1)     | Germany | 16-Mar-2009 | MK365756 | MK365757 | MK365758 | MK365759 | MK365760 | MK365761 | MK365762 | MK365763 |
| A/swine/Niebull/9201-1-/2009 (H1N1)    | Germany | 19-Mar-2009 | MK365764 | MK365765 | MK365766 | MK365767 | MK365768 | MK365769 | MK365770 | MK365771 |
| A/swine/Stadthohn/9247/2009 (H1N1)     | Germany | 20-Mar-2009 | MK365772 | MK365773 | MK365774 | MK365775 | MK365776 | MK365777 | MK365778 | MK365779 |
| A/swine/Rheine/9278/2009 (H1N1)        | Germany | 27-Mar-2009 | MK365780 | MK365781 | MK365782 | MK365783 | MK365784 | MK365785 | MK365786 | MK365787 |
| A/swine/Engelsberg/9321/2009 (H1N1)    | Germany | 27-Mar-2009 | MK365788 | MK365789 | MK365790 | MK365791 | MK365792 | MK365793 | MK365794 | MK365795 |
| A/swine/Herford/9359/2009 (H1N1)       | Germany | 06-Apr-2009 | MK365796 | MK365797 | MK365798 | MK365799 | MK365800 | MK365801 | MK365802 | MK365803 |
| A/swine/Osnabrueck/9368/2009 (H1N1)    | Germany | 07-Apr-2009 | MK365804 | MK365805 | MK365806 | MK365807 | MK365808 | MK365809 | MK365810 | MK365811 |
| A/swine/Goch/9369/2009 (H1N1)          | Germany | 08-Apr-2009 | MK365812 | MK365813 | MK365814 | MK365815 | MK365816 | MK365817 | MK365818 | MK365819 |
| A/swine/Warendorf/9387/2009 (H1N1)     | Germany | 09-Apr-2009 | MK365820 | MK365821 | MK365822 | MK365823 | MK365824 | MK365825 | MK365826 | MK365827 |
| A/swine/Frontenhausen/9388/2009 (H1N1) | Germany | 02-Apr-2009 | MK365828 | MK365829 | MK365830 | MK365831 | MK365832 | MK365833 | MK365834 | MK365835 |
| A/swine/Ereren/9658/2009 (H1N1)        | Germany | 26-May-2009 | MK365836 | MK365837 | MK365838 | MK365839 | MK365840 | MK365841 | MK365842 | MK365843 |
| A/swine/Eggldham/9790/2009 (H1N1)      | Germany | 21-Jun-2009 | MK365844 | MK365845 | MK365846 | MK365847 | MK365848 | MK365849 | MK365850 | MK365851 |
| A/swine/Dornburg/10061/2009 (H1N1)     | Germany | 05-Aug-2009 | MK365852 | MK365853 | MK365854 | MK365855 | MK365856 | MK365857 | MK365858 | MK365859 |
| A/swine/Warendorf/10105/2009 (H1N1)    | Germany | 11-Aug-2009 | MK365860 | MK365861 | MK365862 | MK365863 | MK365864 | MK365865 | MK365866 | MK365867 |
| A/swine/Meppen/10115/2009 (H1N1)       | Germany | 10-Aug-2009 | MK365868 | MK365869 | MK365870 | MK365871 | MK365872 | MK365873 | MK365874 | MK365875 |
| A/swine/Ennigerloh/10277/2009 (H1N1)   | Germany | 02-Sep-2009 | MK365876 | MK365877 | MK365878 | MK365879 | MK365880 | MK365881 | MK365882 | MK365883 |
| A/swine/Egersheim/10464/2009 (H1N1)    | Germany | 16-Sep-2009 | MK365884 | MK365885 | MK365886 | MK365887 | MK365888 | MK365889 | MK365890 | MK365891 |
| A/swine/Lohne/10524/2009 (H1N1)        | Germany | 29-Sep-2009 | MK365892 | MK365893 | MK365894 | MK365895 | MK365896 | MK365897 | MK365898 | MK365899 |
| A/swine/Sögel/10604/2009 (H1N1)        | Germany | 05-Oct-2009 | MK365900 | MK365901 | MK365902 | MK365903 | MK365904 | MK365905 | MK365906 | MK365907 |
| A/swine/Harsefeld/10671/2009 (H1N1)    | Germany | 16-Oct-2009 | MK365908 | MK365909 | MK365910 | MK365911 | MK365912 | MK365913 | MK365914 | MK365915 |
| A/swine/Brakel/10686/2009 (H1N1)       | Germany | 13-Oct-2009 | MK365916 | MK365917 | MK365918 | MK365919 | MK365920 | MK365921 | MK365922 | MK365923 |
| A/swine/Horneburg/10748/2009 (H1N1)    | Germany | 26-Oct-2009 | MK365924 | MK365925 | MK365926 | MK365927 | MK365928 | MK365929 | MK365930 | MK365931 |
| A/swine/Borken/10752a/2009 (H1N1)      | Germany | 26-Oct-2009 | MK365932 | MK365933 | MK365934 | MK365935 | MK365936 | MK365937 | MK365938 | MK365939 |
| A/swine/Lohne/10840/2009 (H1N1)        | Germany | 03-Nov-2009 | MK365940 | MK365941 | MK365942 | MK365943 | MK365944 | MK365945 | MK365946 | MK365947 |

|                                          |         |             |          |          |          |          |          |          |          |          |
|------------------------------------------|---------|-------------|----------|----------|----------|----------|----------|----------|----------|----------|
| A/swine/Norden/11211/2009 (H1N1)         | Germany | 11-Dec-2009 | MK365948 | MK365949 | MK365950 | MK365951 | MK365952 | MK365953 | MK365954 | MK365955 |
| A/swine/Iserlohn/11287/2010 (H1N1)       | Germany | 11-Jan-2010 | MK365956 | MK365957 | MK365958 | MK365959 | MK365960 | MK365961 | MK365962 | MK365963 |
| A/swine/Lohne/11566/2010 (H1N1)          | Germany | 24-Feb-2010 | MK365964 | MK365965 | MK365966 | MK365967 | MK365968 | MK365969 | MK365970 | MK365971 |
| A/swine/Molbergen/11837a/2010 (H1N1)     | Germany | 15-Apr-2010 | MK365972 | MK365973 | MK365974 | MK365975 | MK365976 | MK365977 | MK365978 | MK365979 |
| A/swine/Lohne/11843/2010 (H1N1)          | Germany | 16-Apr-2010 | MK365980 | MK365981 | MK365982 | MK365983 | MK365984 | MK365985 | MK365986 | MK365987 |
| A/swine/Lohne/11867/2010 (H1N1)          | Germany | 20-Apr-2010 | MK365988 | MK365989 | MK365990 | MK365991 | MK365992 | MK365993 | MK365994 | MK365995 |
| A/swine/Visbek/11951-1/2010 (H1N1)       | Germany | 14-May-2010 | MK365996 | MK365997 | MK365998 | MK365999 | MK366000 | MK366001 | MK366002 | MK366003 |
| A/swine/Saizkotten/12021/2010 (H1N1)     | Germany | 01-Jun-2010 | MK366004 | MK366005 | MK366006 | MK366007 | MK366008 | MK366009 | MK366010 | MK366011 |
| A/swine/Molbergen/12127/2010 (H1N1)      | Germany | 25-Jun-2010 | MK366012 | MK366013 | MK366014 | MK366015 | MK366016 | MK366017 | MK366018 | MK366019 |
| A/swine/Raeseveld/12200-1/2010 (H1N1)    | Germany | 23-Jul-2010 | MK366020 | MK366021 | MK366022 | MK366023 | MK366024 | MK366025 | MK366026 | MK366027 |
| A/swine/Raeseveld/12200-2/2010 (H1N1)    | Germany | 23-Jul-2010 | MK366028 | MK366029 | MK366030 | MK366031 | MK366032 | MK366033 | MK366034 | MK366035 |
| A/swine/Brilon/12263-1/2010 (H1N1)       | Germany | 05-Aug-2010 | MK366036 | MK366037 | MK366038 | MK366039 | MK366040 | MK366041 | MK366042 | MK366043 |
| A/swine/Brilon/12263-2/2010 (H1N1)       | Germany | 05-Aug-2010 | MK366044 | MK366045 | MK366046 | MK366047 | MK366048 | MK366049 | MK366050 | MK366051 |
| A/swine/Gnas/12273/2010 (H1N1)           | Austria | 09-Aug-2010 | MK366052 | MK366053 | MK366054 | MK366055 | MK366056 | MK366057 | MK366058 | MK366059 |
| A/swine/Elsten/12291/2010 (H1N1)         | Germany | 13-Aug-2010 | MK366060 | MK366061 | MK366062 | MK366063 | MK366064 | MK366065 | MK366066 | MK366067 |
| A/swine/Lohne/12330/2010 (H1N1)          | Germany | 23-Aug-2010 | MK366068 | MK366069 | MK366070 | MK366071 | MK366072 | MK366073 | MK366074 | MK366075 |
| A/swine/Vechta/12368/2010 (H1N1)         | Germany | 01-Sep-2010 | MK366076 | MK366077 | MK366078 | MK366079 | MK366080 | MK366081 | MK366082 | MK366083 |
| A/swine/Haren/12382-1/2010 (H1N1)        | Germany | 08-Sep-2010 | MK366084 | MK366085 | MK366086 | MK366087 | MK366088 | MK366089 | MK366090 | MK366091 |
| A/swine/Haren/12382-2/2010 (H1N1)        | Germany | 08-Sep-2010 | MK366092 | MK366093 | MK366094 | MK366095 | MK366096 | MK366097 | MK366098 | MK366099 |
| A/swine/Friesoythe/12416/2010 (H1N1)     | Germany | 13-Sep-2010 | MK366100 | MK366101 | MK366102 | MK366103 | MK366104 | MK366105 | MK366106 | MK366107 |
| A/swine/Altenberge/12445-1/2010 (H1N1)   | Germany | 17-Sep-2010 | MK366108 | MK366109 | MK366110 | MK366111 | MK366112 | MK366113 | MK366114 | MK366115 |
| A/swine/Altenberge/12445-2/2010 (H1N1)   | Germany | 17-Sep-2010 | MK366116 | MK366117 | MK366118 | MK366119 | MK366120 | MK366121 | MK366122 | MK366123 |
| A/swine/Höxter/12469/2010 (H1N1)         | Germany | 24-Sep-2010 | MK366124 | MK366125 | MK366126 | MK366127 | MK366128 | MK366129 | MK366130 | MK366131 |
| A/swine/Aulendorf/12502/2010 (H1N1)      | Germany | 04-Oct-2010 | MK366132 | MK366133 | MK366134 | MK366135 | MK366136 | MK366137 | MK366138 | MK366139 |
| A/swine/Warendorf/12524/2010 (H1N1)      | Germany | 08-Oct-2010 | MK366140 | MK366141 | MK366142 | MK366143 | MK366144 | MK366145 | MK366146 | MK366147 |
| A/swine/Raddestorf/12564/2010 (H1N1)     | Germany | 13-Oct-2010 | MK366148 | MK366149 | MK366150 | MK366151 | MK366152 | MK366153 | MK366154 | MK366155 |
| A/swine/Borchen/12595a/2010 (H1N1)       | Germany | 21-Oct-2010 | MK366156 | MK366157 | MK366158 | MK366159 | MK366160 | MK366161 | MK366162 | MK366163 |
| A/swine/Borken/12666-1/2010 (H1N1)       | Germany | 04-Nov-2010 | MK366164 | MK366165 | MK366166 | MK366167 | MK366168 | MK366169 | MK366170 | MK366171 |
| A/swine/Borken/12666-2/2010 (H1N1)       | Germany | 04-Nov-2010 | MK366172 | MK366173 | MK366174 | MK366175 | MK366176 | MK366177 | MK366178 | MK366179 |
| A/swine/Balge/12670/2010 (H1N1)          | Germany | 09-Nov-2010 | MK366180 | MK366181 | MK366182 | MK366183 | MK366184 | MK366185 | MK366186 | MK366187 |
| A/swine/Rahden/12686/2010 (H1N1)         | Germany | 10-Nov-2010 | MK366188 | MK366189 | MK366190 | MK366191 | MK366192 | MK366193 | MK366194 | MK366195 |
| A/swine/Haren/12687/2010 (H1N1)          | Germany | 11-Nov-2010 | MK366196 | MK366197 | MK366198 | MK366199 | MK366200 | MK366201 | MK366202 | MK366203 |
| A/swine/Altenberge/12724/2010 (H1N1)     | Germany | 22-Nov-2010 | MK366204 | MK366205 | MK366206 | MK366207 | MK366208 | MK366209 | MK366210 | MK366211 |
| A/swine/Geeste/12729/2010 (H1N1)         | Germany | 22-Nov-2010 | MK366212 | MK366213 | MK366214 | MK366215 | MK366216 | MK366217 | MK366218 | MK366219 |
| A/swine/Herzlake/12861/2011 (H1N1)       | Germany | 03-Jan-2011 | MK366220 | MK366221 | MK366222 | MK366223 | MK366224 | MK366225 | MK366226 | MK366227 |
| A/swine/Ostbevern/12867-1/2011 (H1N1)    | Germany | 04-Jan-2011 | MK366228 | MK366229 | MK366230 | MK366231 | MK366232 | MK366233 | MK366234 | MK366235 |
| A/swine/Ostbevern/12867-2/2011 (H1N1)    | Germany | 04-Jan-2011 | MK366236 | MK366237 | MK366238 | MK366239 | MK366240 | MK366241 | MK366242 | MK366243 |
| A/swine/Bösel/12937/2011 (H1N1)          | Germany | 25-Jan-2011 | MK366244 | MK366245 | MK366246 | MK366247 | MK366248 | MK366249 | MK366250 | MK366251 |
| A/swine/Ebbinghof/IDT12991-1/2011 (H1N1) | Germany | 07-Feb-2011 | KC222529 | KC222530 | KC222531 | KC222532 | KC222533 | KC222534 | KC222535 | KC222536 |
| A/swine/Goldenstedt/13046/2011 (H1N1)    | Germany | 18-Feb-2011 | MK366252 | MK366253 | MK366254 | MK366255 | MK366256 | MK366257 | MK366258 | MK366259 |
| A/swine/Nordhorn/13095-1/2011 (H1N1)     | Germany | 01-Mar-2011 | MK366260 | MK366261 | MK366262 | MK366263 | MK366264 | MK366265 | MK366266 | MK366267 |
| A/swine/Geseke/13124/2011 (H1N1)         | Germany | 01-Mar-2011 | MK366268 | MK366269 | MK366270 | MK366271 | MK366272 | MK366273 | MK366274 | MK366275 |
| A/swine/Barnstorf/13130/2011 (H1N1)      | Germany | 09-Mar-2011 | MK366276 | MK366277 | MK366278 | MK366279 | MK366280 | MK366281 | MK366282 | MK366283 |
| A/swine/Geseke/13216/2011 (H1N1)         | Germany | 29-Mar-2011 | MK366284 | MK366285 | MK366286 | MK366287 | MK366288 | MK366289 | MK366290 | MK366291 |
| A/swine/Norden/13225-1/2011 (H1N1)       | Germany | 01-Apr-2011 | MK366292 | MK366293 | MK366294 | MK366295 | MK366296 | MK366297 | MK366298 | MK366299 |
| A/swine/Norden/13236-2/2011 (H1N1)       | Germany | 04-Apr-2011 | MK366300 | MK366301 | MK366302 | MK366303 | MK366304 | MK366305 | MK366306 | MK366307 |
| A/swine/Warstein/13455/2011 (H1N1)       | Germany | 24-May-2011 | MK366308 | MK366309 | MK366310 | MK366311 | MK366312 | MK366313 | MK366314 | MK366315 |
| A/swine/Bakum/13456/2011 (H1N1)          | Germany | 24-May-2011 | MK366316 | MK366317 | MK366318 | MK366319 | MK366320 | MK366321 | MK366322 | MK366323 |
| A/swine/Lohne/13474/2011 (H1N1)          | Germany | 26-May-2011 | MK366324 | MK366325 | MK366326 | MK366327 | MK366328 | MK366329 | MK366330 | MK366331 |
| A/swine/Wasserleben/13484/2011 (H1N1)    | Germany | 30-May-2011 | MK366332 | MK366333 | MK366334 | MK366335 | MK366336 | MK366337 | MK366338 | MK366339 |
| A/swine/Ascheberg/13532/2011 (H1N1)      | Germany | 16-Jun-2011 | MK366340 | MK366341 | MK366342 | MK366343 | MK366344 | MK366345 | MK366346 | MK366347 |
| A/swine/Erwitte/13614/2011 (H1N1)        | Germany | 04-Jul-2011 | MK366348 | MK366349 | MK366350 | MK366351 | MK366352 | MK366353 | MK366354 | MK366355 |
| A/swine/Lohne/13624/2011 (H1N1)          | Germany | 15-Jul-2011 | MK366356 | MK366357 | MK366358 | MK366359 | MK366360 | MK366361 | MK366362 | MK366363 |
| A/swine/Norden/13638/2011 (H1N1)         | Germany | 19-Jul-2011 | MK366364 | MK366365 | MK366366 | MK366367 | MK366368 | MK366369 | MK366370 | MK366371 |
| A/swine/Garrel/13676/2011 (H1N1)         | Germany | 25-Jul-2011 | MK366372 | MK366373 | MK366374 | MK366375 | MK366376 | MK366377 | MK366378 | MK366379 |
| A/swine/Hemmoor/13756/2011 (H1N1)        | Germany | 15-Aug-2011 | MK366380 | MK366381 | MK366382 | MK366383 | MK366384 | MK366385 | MK366386 | MK366387 |

|                                                |             |             |          |          |          |          |          |          |          |          |
|------------------------------------------------|-------------|-------------|----------|----------|----------|----------|----------|----------|----------|----------|
| A/swine/Steinfurt/13758/2011 (H1N1)            | Germany     | 14-Aug-2011 | MK366388 | MK366389 | MK366390 | MK366391 | MK366392 | MK366393 | MK366394 | MK366395 |
| A/swine/Bothenheilingen/13765-3/2011 (H1N1)    | Germany     | 15-Aug-2011 | MK366396 | MK366397 | MK366398 | MK366399 | MK366400 | MK366401 | MK366402 | MK366403 |
| A/swine/Steinfeld/13785/2011 (H1N1)            | Germany     | 19-Aug-2011 | MK366404 | MK366405 | MK366406 | MK366407 | MK366408 | MK366409 | MK366410 | MK366411 |
| A/swine/Vechta/13789/2011 (H1N1)               | Germany     | 23-Aug-2011 | MK366412 | MK366413 | MK366414 | MK366415 | MK366416 | MK366417 | MK366418 | MK366419 |
| A/swine/Heiden/13820/2011 (H1N1)               | Germany     | 24-Aug-2011 | MK366420 | MK366421 | MK366422 | MK366423 | MK366424 | MK366425 | MK366426 | MK366427 |
| A/swine/Georgsmarienhütte/13824-2/2011 (H1N1)  | Germany     | 29-Aug-2011 | MK366428 | MK366429 | MK366430 | MK366431 | MK366432 | MK366433 | MK366434 | MK366435 |
| A/swine/Viersen/13836/2011 (H1N1)              | Germany     | 31-Aug-2011 | MK366436 | MK366437 | MK366438 | MK366439 | MK366440 | MK366441 | MK366442 | MK366443 |
| A/swine/Sittensen/13857-3/2011 (H1N1)          | Germany     | 07-Sep-2011 | MK366444 | MK366445 | MK366446 | MK366447 | MK366448 | MK366449 | MK366450 | MK366451 |
| A/swine/Ankum/13894/2011 (H1N1)                | Germany     | 12-Sep-2011 | MK366452 | MK366453 | MK366454 | MK366455 | MK366456 | MK366457 | MK366458 | MK366459 |
| A/swine/Lohne/13895/2011 (H1N1)                | Germany     | 09-Sep-2011 | MK366460 | MK366461 | MK366462 | MK366463 | MK366464 | MK366465 | MK366466 | MK366467 |
| A/swine/Gossau/14060-1/2011 (H1N1)             | Switzerland | 14-Oct-2011 | MK366468 | MK366469 | MK366470 | MK366471 | MK366472 | MK366473 | MK366474 | MK366475 |
| A/swine/Lohne/14087/2011 (H1N1)                | Germany     | 19-Oct-2011 | MK366476 | MK366477 | MK366478 | MK366479 | MK366480 | MK366481 | MK366482 | MK366483 |
| A/swine/Norden/14100-2/2011 (H1N1)             | Germany     | 20-Oct-2011 | MK366484 | MK366485 | MK366486 | MK366487 | MK366488 | MK366489 | MK366490 | MK366491 |
| A/swine/Straelen/14101/2011 (H1N1)             | Germany     | 25-Oct-2011 | MK366492 | MK366493 | MK366494 | MK366495 | MK366496 | MK366497 | MK366498 | MK366499 |
| A/swine/Garrel/14103/2011 (H1N1)               | Germany     | 26-Oct-2011 | MK366500 | MK366501 | MK366502 | MK366503 | MK366504 | MK366505 | MK366506 | MK366507 |
| A/swine/Ankum/14132/2011 (H1N1)                | Germany     | 02-Nov-2011 | MK366508 | MK366509 | MK366510 | MK366511 | MK366512 | MK366513 | MK366514 | MK366515 |
| A/swine/Lohne/14134/2011 (H1N1)                | Germany     | 01-Nov-2011 | MK366516 | MK366517 | MK366518 | MK366519 | MK366520 | MK366521 | MK366522 | MK366523 |
| A/swine/Buch/14162/2011 (H1N1)                 | Germany     | 01-Nov-2011 | MK366524 | MK366525 | MK366526 | MK366527 | MK366528 | MK366529 | MK366530 | MK366531 |
| A/swine/Celle/14169/2011 (H1N1)                | Germany     | 02-Nov-2011 | MK366532 | MK366533 | MK366534 | MK366535 | MK366536 | MK366537 | MK366538 | MK366539 |
| A/swine/Lohne/14170/2011 (H1N1)                | Germany     | 09-Nov-2011 | MK366540 | MK366541 | MK366542 | MK366543 | MK366544 | MK366545 | MK366546 | MK366547 |
| A/swine/Friesoythe/14174/2011 (H1N1)           | Germany     | 09-Nov-2011 | MK366548 | MK366549 | MK366550 | MK366551 | MK366552 | MK366553 | MK366554 | MK366555 |
| A/swine/Heudorf-Meißkirch/IDT14176/2011 (H1N1) | Germany     | 09-Nov-2011 | KC631885 | KC631886 | KC631887 | KC631888 | KC631889 | KC631890 | KC631891 | KC631892 |
| A/swine/Neumark/IDT14179/2011 (H1N1)           | Germany     | 10-Nov-2011 | KC222585 | KC222586 | KC222587 | KC222588 | KC222589 | KC222590 | KC222591 | KC222592 |
| A/swine/Buch/14226-1/2011 (H1N1)               | Germany     | 18-Nov-2011 | MK366556 | MK366557 | MK366558 | MK366559 | MK366560 | MK366561 | MK366562 | MK366563 |
| A/swine/Hamersen/14228/2011 (H1N1)             | Germany     | 18-Nov-2011 | MK366564 | MK366565 | MK366566 | MK366567 | MK366568 | MK366569 | MK366570 | MK366571 |
| A/swine/Gronau/14349/2011 (H1N1)               | Germany     | 29-Nov-2011 | MK366572 | MK366573 | MK366574 | MK366575 | MK366576 | MK366577 | MK366578 | MK366579 |
| A/swine/Wettedorf/14350/2011 (H1N1)            | Germany     | 30-Nov-2011 | MK366580 | MK366581 | MK366582 | MK366583 | MK366584 | MK366585 | MK366586 | MK366587 |
| A/swine/Pfeffenhausen/14351/2011 (H1N1)        | Germany     | 30-Nov-2011 | MK366588 | MK366589 | MK366590 | MK366591 | MK366592 | MK366593 | MK366594 | MK366595 |
| A/swine/Ahrenswohld/14395/2011 (H1N1)          | Germany     | 13-Dec-2011 | MK366596 | MK366597 | MK366598 | MK366599 | MK366600 | MK366601 | MK366602 | MK366603 |
| A/swine/Büren/14396/2011 (H1N1)                | Germany     | 12-Dec-2011 | MK366604 | MK366605 | MK366606 | MK366607 | MK366608 | MK366609 | MK366610 | MK366611 |
| A/swine/Bad Wünnenberg/14402/2011 (H1N1)       | Germany     | 08-Dec-2011 | MK366612 | MK366613 | MK366614 | MK366615 | MK366616 | MK366617 | MK366618 | MK366619 |
| A/swine/Metelen/14413-2/2011 (H1N1)            | Germany     | 14-Dec-2011 | MK366620 | MK366621 | MK366622 | MK366623 | MK366624 | MK366625 | MK366626 | MK366627 |
| A/swine/Lohne/14425/2011 (H1N1)                | Germany     | 14-Dec-2011 | MK366628 | MK366629 | MK366630 | MK366631 | MK366632 | MK366633 | MK366634 | MK366635 |
| A/swine/Rheinberg/14457-1/2011 (H1N1)          | Germany     | 14-Dec-2011 | MK366636 | MK366637 | MK366638 | MK366639 | MK366640 | MK366641 | MK366642 | MK366643 |
| A/swine/Straelen/14460-2/2011 (H1N1)           | Germany     | 22-Dec-2011 | MK366644 | MK366645 | MK366646 | MK366647 | MK366648 | MK366649 | MK366650 | MK366651 |
| A/swine/Ochtrup/14485-1/2011 (H1N1)            | Germany     | 22-Dec-2011 | MK366652 | MK366653 | MK366654 | MK366655 | MK366656 | MK366657 | MK366658 | MK366659 |
| A/swine/Ochtrup/14606/2012 (H1N1)              | Germany     | 13-Jan-2012 | MK366660 | MK366661 | MK366662 | MK366663 | MK366664 | MK366665 | MK366666 | MK366667 |
| A/swine/Lohne/14611/2012 (H1N1)                | Germany     | 19-Jan-2012 | MK366668 | MK366669 | MK366670 | MK366671 | MK366672 | MK366673 | MK366674 | MK366675 |
| A/swine/Neuharlingersiel/14624-3/2012 (H1N1)   | Germany     | 23-Jan-2012 | MK366676 | MK366677 | MK366678 | MK366679 | MK366680 | MK366681 | MK366682 | MK366683 |
| A/swine/Ahlen/14631/2012 (H1N1)                | Germany     | 18-Jan-2012 | MK366684 | MK366685 | MK366686 | MK366687 | MK366688 | MK366689 | MK366690 | MK366691 |
| A/swine/Harsefeld/14637/2012 (H1N1)            | Germany     | 24-Jan-2012 | MK366692 | MK366693 | MK366694 | MK366695 | MK366696 | MK366697 | MK366698 | MK366699 |
| A/swine/Rheda/14657/2012 (H1N1)                | Germany     | 24-Jan-2012 | MK366700 | MK366701 | MK366702 | MK366703 | MK366704 | MK366705 | MK366706 | MK366707 |
| A/swine/Billerbeck/14666/2012 (H1N1)           | Germany     | 30-Jan-2012 | MK366708 | MK366709 | MK366710 | MK366711 | MK366712 | MK366713 | MK366714 | MK366715 |
| A/swine/Rosendahl/14669-3/2012 (H1N1)          | Germany     | 25-Jan-2012 | MK366716 | MK366717 | MK366718 | MK366719 | MK366720 | MK366721 | MK366722 | MK366723 |
| A/swine/Emsbüren/14689-2/2012 (H1N1)           | Germany     | 31-Jan-2012 | MK366724 | MK366725 | MK366726 | MK366727 | MK366728 | MK366729 | MK366730 | MK366731 |
| A/swine/Frankfurt/14693/2012 (H1N1)            | Germany     | 01-Feb-2012 | MK366732 | MK366733 | MK366734 | MK366735 | MK366736 | MK366737 | MK366738 | MK366739 |
| A/swine/Friesoythe/14696/2012 (H1N1)           | Germany     | 01-Feb-2012 | MK366740 | MK366741 | MK366742 | MK366743 | MK366744 | MK366745 | MK366746 | MK366747 |
| A/swine/Lohne/14721-1/2012 (H1N1)              | Germany     | 06-Feb-2012 | MK366748 | MK366749 | MK366750 | MK366751 | MK366752 | MK366753 | MK366754 | MK366755 |
| A/swine/Legden/14730/2012 (H1N1)               | Germany     | 09-Feb-2012 | MK366756 | MK366757 | MK366758 | MK366759 | MK366760 | MK366761 | MK366762 | MK366763 |
| A/swine/Lohne/14766/2012 (H1N1)                | Germany     | 13-Feb-2012 | MK366764 | MK366765 | MK366766 | MK366767 | MK366768 | MK366769 | MK366770 | MK366771 |
| A/swine/Marsberg/14769/2012 (H1N1)             | Germany     | 14-Feb-2012 | MK366772 | MK366773 | MK366774 | MK366775 | MK366776 | MK366777 | MK366778 | MK366779 |
| A/swine/Diemelstadt/14770/2012 (H1N1)          | Germany     | 14-Feb-2012 | MK366780 | MK366781 | MK366782 | MK366783 | MK366784 | MK366785 | MK366786 | MK366787 |
| A/swine/Coesfeld/14811/2012 (H1N1)             | Germany     | 17-Feb-2012 | MK366788 | MK366789 | MK366790 | MK366791 | MK366792 | MK366793 | MK366794 | MK366795 |
| A/swine/Scharfenberg/15021/2012 (H1N1)         | Germany     | 12-Mar-2012 | MK366796 | MK366797 | MK366798 | MK366799 | MK366800 | MK366801 | MK366802 | MK366803 |
| A/swine/Ruploh/15022/2012 (H1N1)               | Germany     | 06-Mar-2012 | MK366805 | MK366806 | MK366807 | MK366808 | MK366809 | MK366810 | MK366811 | MK366812 |
| A/swine/Lüdinghausen/15060-1/2012 (H1N1)       | Germany     | 20-Mar-2012 | MK366812 | MK366813 | MK366814 | MK366815 | MK366816 | MK366817 | MK366818 | MK366819 |



|                                                |             |             |          |          |          |          |          |          |          |          |
|------------------------------------------------|-------------|-------------|----------|----------|----------|----------|----------|----------|----------|----------|
| A/swine/Dülmen/15075/2012 (H1N1)               | Germany     | 21-Mar-2012 | MK366820 | MK366821 | MK366822 | MK366823 | MK366824 | MK366825 | MK366826 | MK366827 |
| A/swine/Fulda/15116/2012 (H1N1)                | Germany     | 24-Mar-2012 | MK366828 | MK366829 | MK366830 | MK366831 | MK366832 | MK366833 | MK366834 | MK366835 |
| A/swine/Nordhorn/15118/2012 (H1N1)             | Germany     | 29-Mar-2012 | MK366836 | MK366837 | MK366838 | MK366839 | MK366840 | MK366841 | MK366842 | MK366843 |
| A/swine/Rottenburg/15122/2012 (H1N1)           | Germany     | 12-Apr-2012 | MK366844 | MK366845 | MK366846 | MK366847 | MK366848 | MK366849 | MK366850 | MK366851 |
| A/swine/Lohne/15137/2012 (H1N1)                | Germany     | 05-Apr-2012 | MK366852 | MK366853 | MK366854 | MK366855 | MK366856 | MK366857 | MK366858 | MK366859 |
| A/swine/Drensteinfurt/15193-1/2012 (H1N1)      | Germany     | 16-Apr-2012 | MK366860 | MK366861 | MK366862 | MK366863 | MK366864 | MK366865 | MK366866 | MK366867 |
| A/swine/Wohnste/15223/2012 (H1N1)              | Germany     | 18-Apr-2012 | MK366868 | MK366869 | MK366870 | MK366871 | MK366872 | MK366873 | MK366874 | MK366875 |
| A/swine/Lohne/15374/2012 (H1N1)                | Germany     | 21-May-2012 | MK366876 | MK366877 | MK366878 | MK366879 | MK366880 | MK366881 | MK366882 | MK366883 |
| A/swine/Meppen/15514/2012 (H1N1)               | Germany     | 25-Jun-2012 | MK366884 | MK366885 | MK366886 | MK366887 | MK366888 | MK366889 | MK366890 | MK366891 |
| A/swine/Neuenhaus/16826/2013 (H1N1)            | Germany     | 07-Jan-2013 | MK366892 | MK366893 | MK366894 | MK366895 | MK366896 | MK366897 | MK366898 | MK366899 |
| A/swine/Mengkofen/17020/2013 (H1N1)            | Germany     | 14-Jan-2013 | MK366900 | MK366901 | MK366902 | MK366903 | MK366904 | MK366905 | MK366906 | MK366907 |
| A/swine/Hirschberg/17193/2013 (H1N1)           | Germany     | 12-Feb-2013 | MK366908 | MK366909 | MK366910 | MK366911 | MK366912 | MK366913 | MK366914 | MK366915 |
| A/swine/Wurster Nordseeküste/17217/2013 (H1N1) | Germany     | 15-Feb-2013 | MK366916 | MK366917 | MK366918 | MK366919 | MK366920 | MK366921 | MK366922 | MK366923 |
| A/swine/Schneiderkrug/17263/2013 (H1N1)        | Germany     | 22-Feb-2013 | MK366924 | MK366925 | MK366926 | MK366927 | MK366928 | MK366929 | MK366930 | MK366931 |
| A/swine/Klein Wanzleben/17303/2013 (H1N1)      | Germany     | 26-Feb-2013 | MK366932 | MK366933 | MK366934 | MK366935 | MK366936 | MK366937 | MK366938 | MK366939 |
| A/swine/Kalefeld/17614/2013 (H1N1)             | Germany     | 26-Mar-2013 | MK366940 | MK366941 | MK366942 | MK366943 | MK366944 | MK366945 | MK366946 | MK366947 |
| A/swine/Minden-Lübbecke/17934/2013 (H1N1)      | Germany     | 23-May-2013 | MK366948 | MK366949 | MK366950 | MK366951 | MK366952 | MK366953 | MK366954 | MK366955 |
| A/swine/Melle/18077/2013 (H1N1)                | Germany     | 21-Jun-2013 | MK366956 | MK366957 | MK366958 | MK366959 | MK366960 | MK366961 | MK366962 | MK366963 |
| A/swine/Ahaus/18137/2013 (H1N1)                | Germany     | 01-Jul-2013 | MK366964 | MK366965 | MK366966 | MK366967 | MK366968 | MK366969 | MK366970 | MK366971 |
| A/swine/Langenammung/18152/2013 (H1N1)         | Germany     | 01-Jul-2013 | MK366972 | MK366973 | MK366974 | MK366975 | MK366976 | MK366977 | MK366978 | MK366979 |
| A/swine/Lüdinghausen/18391/2013 (H1N1)         | Germany     | 06-Aug-2013 | MK366980 | MK366981 | MK366982 | MK366983 | MK366984 | MK366985 | MK366986 | MK366987 |
| A/swine/Ascheberg/18498/2013 (H1N1)            | Germany     | 28-Aug-2013 | MK366988 | MK366989 | MK366990 | MK366991 | MK366992 | MK366993 | MK366994 | MK366995 |
| A/swine/Ascheberg/18499/2013 (H1N1)            | Germany     | 29-Aug-2013 | MK366996 | MK366997 | MK366998 | MK366999 | MK367000 | MK367001 | MK367002 | MK367003 |
| A/swine/Nordkirchen/18822/2013 (H1N1)          | Germany     | 02-Oct-2013 | MK367004 | MK367005 | MK367006 | MK367007 | MK367008 | MK367009 | MK367010 | MK367011 |
| A/swine/Drensteinfurt/19244/2013 (H1N1)        | Germany     | 26-Nov-2013 | MK367012 | MK367013 | MK367014 | MK367015 | MK367016 | MK367017 | MK367018 | MK367019 |
| A/swine/Drensteinfurt/19376/2013 (H1N1)        | Germany     | 11-Dec-2013 | MK367020 | MK367021 | MK367022 | MK367023 | MK367024 | MK367025 | MK367026 | MK367027 |
| A/swine/Sandbeierndorf/19533/2014 (H1N1)       | Germany     | 21-Jan-2014 | MK367028 | MK367029 | MK367030 | MK367031 | MK367032 | MK367033 | MK367034 | MK367035 |
| A/swine/Erwitte/19661/2014 (H1N1)              | Germany     | 04-Feb-2014 | MK367036 | MK367037 | MK367038 | MK367039 | MK367040 | MK367041 | MK367042 | MK367043 |
| A/swine/Bothenheilingen/19699/2014 (H1N1)      | Germany     | 17-Feb-2014 | MK367044 | MK367045 | MK367046 | MK367047 | MK367048 | MK367049 | MK367050 | MK367051 |
| A/swine/Bad Griesbach/19758/2014 (H1N1)        | Germany     | 24-Feb-2014 | MK367052 | MK367053 | MK367054 | MK367055 | MK367056 | MK367057 | MK367058 | MK367059 |
| A/swine/Borken/19808/2014 (H1N1)               | Germany     | 05-Mar-2014 | MK367060 | MK367061 | MK367062 | MK367063 | MK367064 | MK367065 | MK367066 | MK367067 |
| A/swine/Rügheim/19841/2014 (H1N1)              | Germany     | 06-Mar-2014 | MK367068 | MK367069 | MK367070 | MK367071 | MK367072 | MK367073 | MK367074 | MK367075 |
| A/swine/Bockhorn/19911/2014 (H1N1)             | Germany     | 24-Mar-2014 | MK367076 | MK367077 | MK367078 | MK367079 | MK367080 | MK367081 | MK367082 | MK367083 |
| A/swine/Ahorn/19945/2014 (H1N1)                | Germany     | 31-Mar-2014 | MK367084 | MK367085 | MK367086 | MK367087 | MK367088 | MK367089 | MK367090 | MK367091 |
| A/swine/Schallern/IDT19989/2014 (H1N1)         | Germany     | 11-Apr-2014 | KX013010 | KX013011 | KX013012 | KX013013 | KX013014 | KX013015 | KX013016 | KX013017 |
| A/swine/Ascheberg/19992/2014 (H1N1)            | Germany     | 11-Apr-2014 | MK367092 | MK367093 | MK367094 | MK367095 | MK367096 | MK367097 | MK367098 | MK367099 |
| A/swine/Mörsbrunn/20096/2014 (H1N1)            | Germany     | 06-May-2014 | MK367100 | MK367101 | MK367102 | MK367103 | MK367104 | MK367105 | MK367106 | MK367107 |
| A/swine/Essen/20452/2014 (H1N1)                | Germany     | 31-Jul-2014 | MK367108 | MK367109 | MK367110 | MK367111 | MK367112 | MK367113 | MK367114 | MK367115 |
| A/swine/Bad Wünnenberg/20518/2014 (H1N1)       | Germany     | 20-Aug-2014 | MK367116 | MK367117 | MK367118 | MK367119 | MK367120 | MK367121 | MK367122 | MK367123 |
| A/swine/Rosendahl/20634/2014 (H1N1)            | Germany     | 16-Sep-2014 | MK367124 | MK367125 | MK367126 | MK367127 | MK367128 | MK367129 | MK367130 | MK367131 |
| A/swine/Everswinkel/20648/2014 (H1N1)          | Germany     | 12-Sep-2014 | MK367132 | MK367133 | MK367134 | MK367135 | MK367136 | MK367137 | MK367138 | MK367139 |
| A/swine/Wachstum/20657/2014 (H1N1)             | Germany     | 10-Aug-2014 | MK367140 | MK367141 | MK367142 | MK367143 | MK367144 | MK367145 | MK367146 | MK367147 |
| A/swine/Lohne/20709/2014 (H1N1)                | Germany     | 06-Oct-2014 | MK367148 | MK367149 | MK367150 | MK367151 | MK367152 | MK367153 | MK367154 | MK367155 |
| A/swine/Garrel/20734/2014 (H1N1)               | Germany     | 10-Oct-2014 | MK367156 | MK367157 | MK367158 | MK367159 | MK367160 | MK367161 | MK367162 | MK367163 |
| A/swine/Baarle Nassau/20825/2014 (H1N1)        | Austria     | 26-Oct-2014 | MK367164 | MK367165 | MK367166 | MK367167 | MK367168 | MK367169 | MK367170 | MK367171 |
| A/swine/Feldbach/20834/2014 (H1N1)             | Austria     | 23-Oct-2014 | MK367172 | MK367173 | MK367174 | MK367175 | MK367176 | MK367177 | MK367178 | MK367179 |
| A/swine/Rüthen/20843/2014 (H1N1)               | Germany     | 24-Oct-2014 | MK367180 | MK367181 | MK367182 | MK367183 | MK367184 | MK367185 | MK367186 | MK367187 |
| A/swine/Haaren/20977/2014 (H1N1)               | Germany     | 21-Oct-2014 | MK367188 | MK367189 | MK367190 | MK367191 | MK367192 | MK367193 | MK367194 | MK367195 |
| A/swine/Langen/20991/2014 (H1N1)               | Germany     | 24-Nov-2014 | MK367196 | MK367197 | MK367198 | MK367199 | MK367200 | MK367201 | MK367202 | MK367203 |
| A/swine/Glabbeek/21006/2014 (H1N1)             | Belgium     | 26-Nov-2014 | MK367204 | MK367205 | MK367206 | MK367207 | MK367208 | MK367209 | MK367210 | MK367211 |
| A/swine/Steinfeld/21010/2014 (H1N1)            | Germany     | 25-Nov-2014 | MK367212 | MK367213 | MK367214 | MK367215 | MK367216 | MK367217 | MK367218 | MK367219 |
| A/swine/Mariaheide/21031/2014 (H1N1)           | Netherlands | 27-Nov-2014 | MK367220 | MK367221 | MK367222 | MK367223 | MK367224 | MK367225 | MK367226 | MK367227 |
| A/swine/Harreveld/21082/2014 (H1N1)            | Netherlands | 11-Dec-2014 | MK367228 | MK367229 | MK367230 | MK367231 | MK367232 | MK367233 | MK367234 | MK367235 |
| A/swine/Borken/21107/2014 (H1N1)               | Germany     | 10-Dec-2014 | MK367236 | MK367237 | MK367238 | MK367239 | MK367240 | MK367241 | MK367242 | MK367243 |
| A/swine/Heinsberg/21114/2014 (H1N1)            | Germany     | 22-Dec-2014 | MK367244 | MK367245 | MK367246 | MK367247 | MK367248 | MK367249 | MK367250 | MK367251 |
| A/swine/Werl/21120/2014 (H1N1)                 | Germany     | 22-Dec-2014 | MK367252 | MK367253 | MK367254 | MK367255 | MK367256 | MK367257 | MK367258 | MK367259 |

|                                            |             |             |          |          |          |          |          |          |          |          |
|--------------------------------------------|-------------|-------------|----------|----------|----------|----------|----------|----------|----------|----------|
| A/swine/Moenchengladbach/21124/2015 (H1N1) | Germany     | 05-Jan-2015 | MK367260 | MK367261 | MK367262 | MK367263 | MK367264 | MK367265 | MK367266 | MK367267 |
| A/swine/Oldenzaal/21126/2014 (H1N1)        | Netherlands | 16-Dec-2014 | MK367268 | MK367269 | MK367270 | MK367271 | MK367272 | MK367273 | MK367274 | MK367275 |
| A/swine/Cloppenburg/21149/2014 (H1N1)      | Germany     | 21-Dec-2014 | MK367276 | MK367277 | MK367278 | MK367279 | MK367280 | MK367281 | MK367282 | MK367283 |
| A/swine/Rhede/21178/2015 (H1N1)            | Germany     | 16-Jan-2015 | MK367284 | MK367285 | MK367286 | MK367287 | MK367288 | MK367289 | MK367290 | MK367291 |
| A/swine/Goch/21216/2015 (H1N1)             | Germany     | 22-Jan-2015 | MK367292 | MK367293 | MK367294 | MK367295 | MK367296 | MK367297 | MK367298 | MK367299 |
| A/swine/Cloppenburg/21225/2015 (H1N1)      | Germany     | 26-Jan-2015 | MK367300 | MK367301 | MK367302 | MK367303 | MK367304 | MK367305 | MK367306 | MK367307 |
| A/swine/Cloppenburg/21226/2015 (H1N1)      | Germany     | 26-Jan-2015 | MK367308 | MK367309 | MK367310 | MK367311 | MK367312 | MK367313 | MK367314 | MK367315 |
| A/swine/Graben/21396-2/2015 (H1N1)         | Germany     | 02-Mar-2015 | MK367316 | MK367317 | MK367318 | MK367319 | MK367320 | MK367321 | MK367322 | MK367323 |
| A/swine/Oirlo/21422/2015 (H1N1)            | Netherlands | 10-Mar-2015 | MK367324 | MK367325 | MK367326 | MK367327 | MK367328 | MK367329 | MK367330 | MK367331 |
| A/swine/Steinberg/21495/2015 (H1N1)        | Germany     | 25-Mar-2015 | MK367332 | MK367333 | MK367334 | MK367335 | MK367336 | MK367337 | MK367338 | MK367339 |
| A/swine/Diepholz/21603/2015 (H1N1)         | Germany     | 15-Apr-2015 | MK367340 | MK367341 | MK367342 | MK367343 | MK367344 | MK367345 | MK367346 | MK367347 |
| A/swine/Schwedeneck/21724/2015 (H1N1)      | Germany     | 21-May-2015 | MK367348 | MK367349 | MK367350 | MK367351 | MK367352 | MK367353 | MK367354 | MK367355 |
| A/swine/Lüdinghausen/21728/2015 (H1N1)     | Germany     | 21-May-2015 | MK367356 | MK367357 | MK367358 | MK367359 | MK367360 | MK367361 | MK367362 | MK367363 |
| A/swine/Soest/21748/2015 (H1N1)            | Germany     | 26-May-2015 | MK367364 | MK367365 | MK367366 | MK367367 | MK367368 | MK368369 | MK367370 | MK367371 |
| A/swine/Sögel/22071/2015 (H1N1)            | Germany     | 26-Aug-2015 | MK367372 | MK367373 | MK367374 | MK367375 | MK367376 | MK367377 | MK367378 | MK367379 |
| A/swine/Dülmen/22335/2015 (H1N1)           | Germany     | 29-Oct-2015 | MK367380 | MK367381 | MK367382 | MK367383 | MK367384 | MK367385 | MK367386 | MK367387 |
