# Supplementary material for: Cocirculation of Swine H1N1 Influenza A Virus Lineages in Germany
Source: MDPI journal article supplement (doi:10.3390/v12070762), 2020-07-15
Supplement: s1 [file s1]

# Suppl. Fig. 2

# NAN1

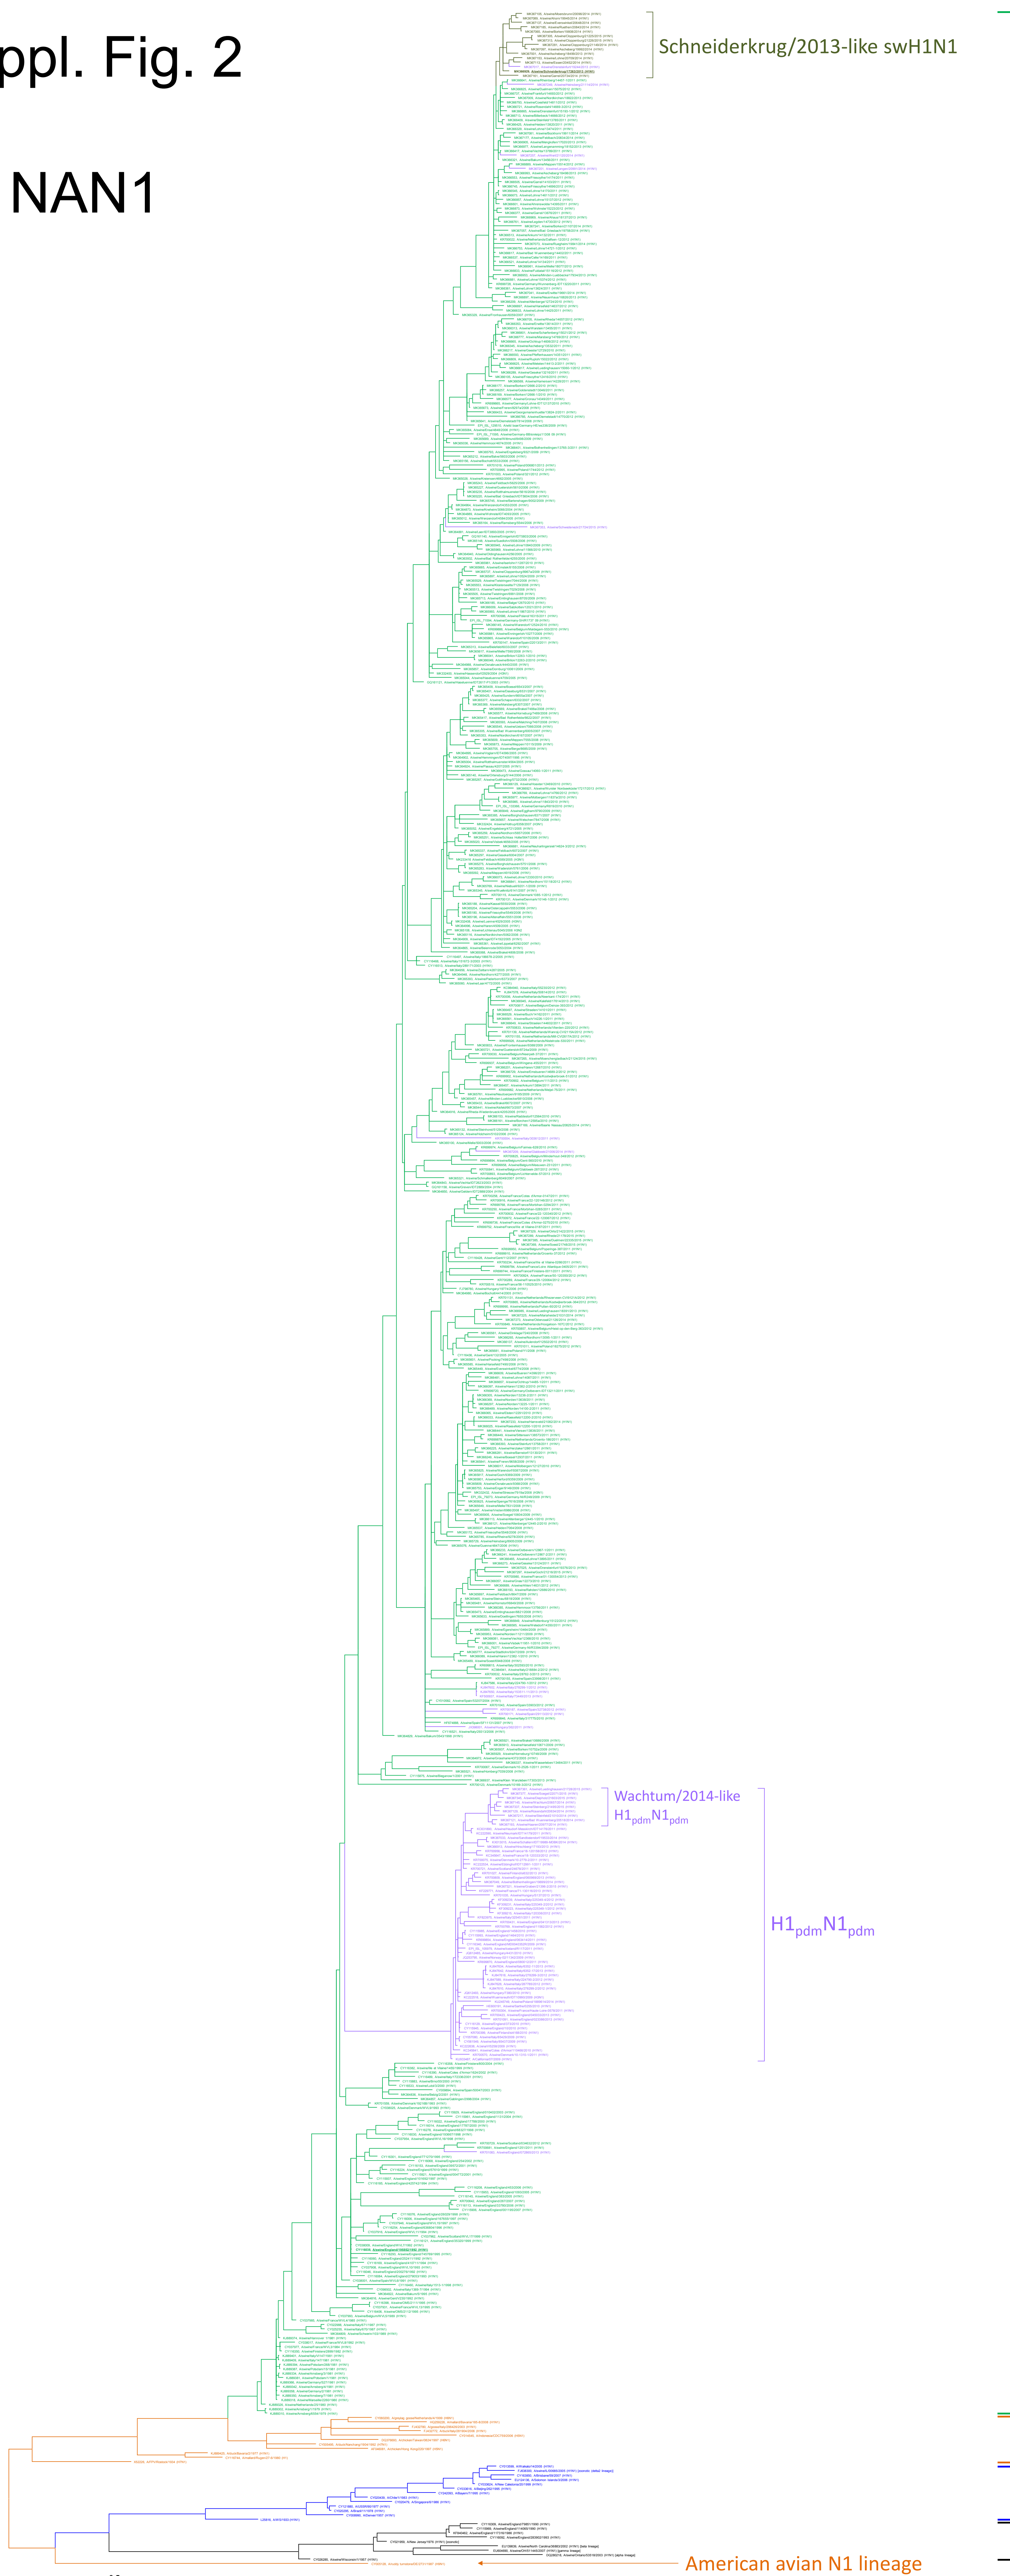

# EA swH1N1

Eurasian avian N1 lineage.

$$H1_{\text{seas}} N1_{\text{sea}}$$

CS H1N1, NTR swH1N1

American avian N1 lineage
