# Supplementary material for: Cocirculation of Swine H1N1 Influenza A Virus Lineages in Germany
Source: Viruses. 2020 Jul 15;12(7):762. doi: 10.3390/v12070762 (PMC7411773; doi:10.3390/v12070762)
Supplement: Supplementary file 1 [file viruses-12-00762-s001.zip]

Archive with 9 entries (9 files):
- Zell_et_al_Supplementary_Files_revised/Fig S1.pdf
- Zell_et_al_Supplementary_Files_revised/Fig S2.pdf
- Zell_et_al_Supplementary_Files_revised/Fig S3.pdf
- Zell_et_al_Supplementary_Files_revised/Fig S4.pdf
- Zell_et_al_Supplementary_Files_revised/Fig S5A.pdf
- Zell_et_al_Supplementary_Files_revised/Fig S5B.pdf
- Zell_et_al_Supplementary_Files_revised/Fig S5C.pdf
- Zell_et_al_Supplementary_Files_revised/Legends to Supplementary Figures.pdf
- Zell_et_al_Supplementary_Files_revised/Table_S1.pdf
