# Supplementary figures and images for: Cocirculation of Swine H1N1 Influenza A Virus Lineages in Germany
Source: MDPI journal article supplement (doi:10.3390/v12070762), 2020-07-15

Suppl. Fig. 5A

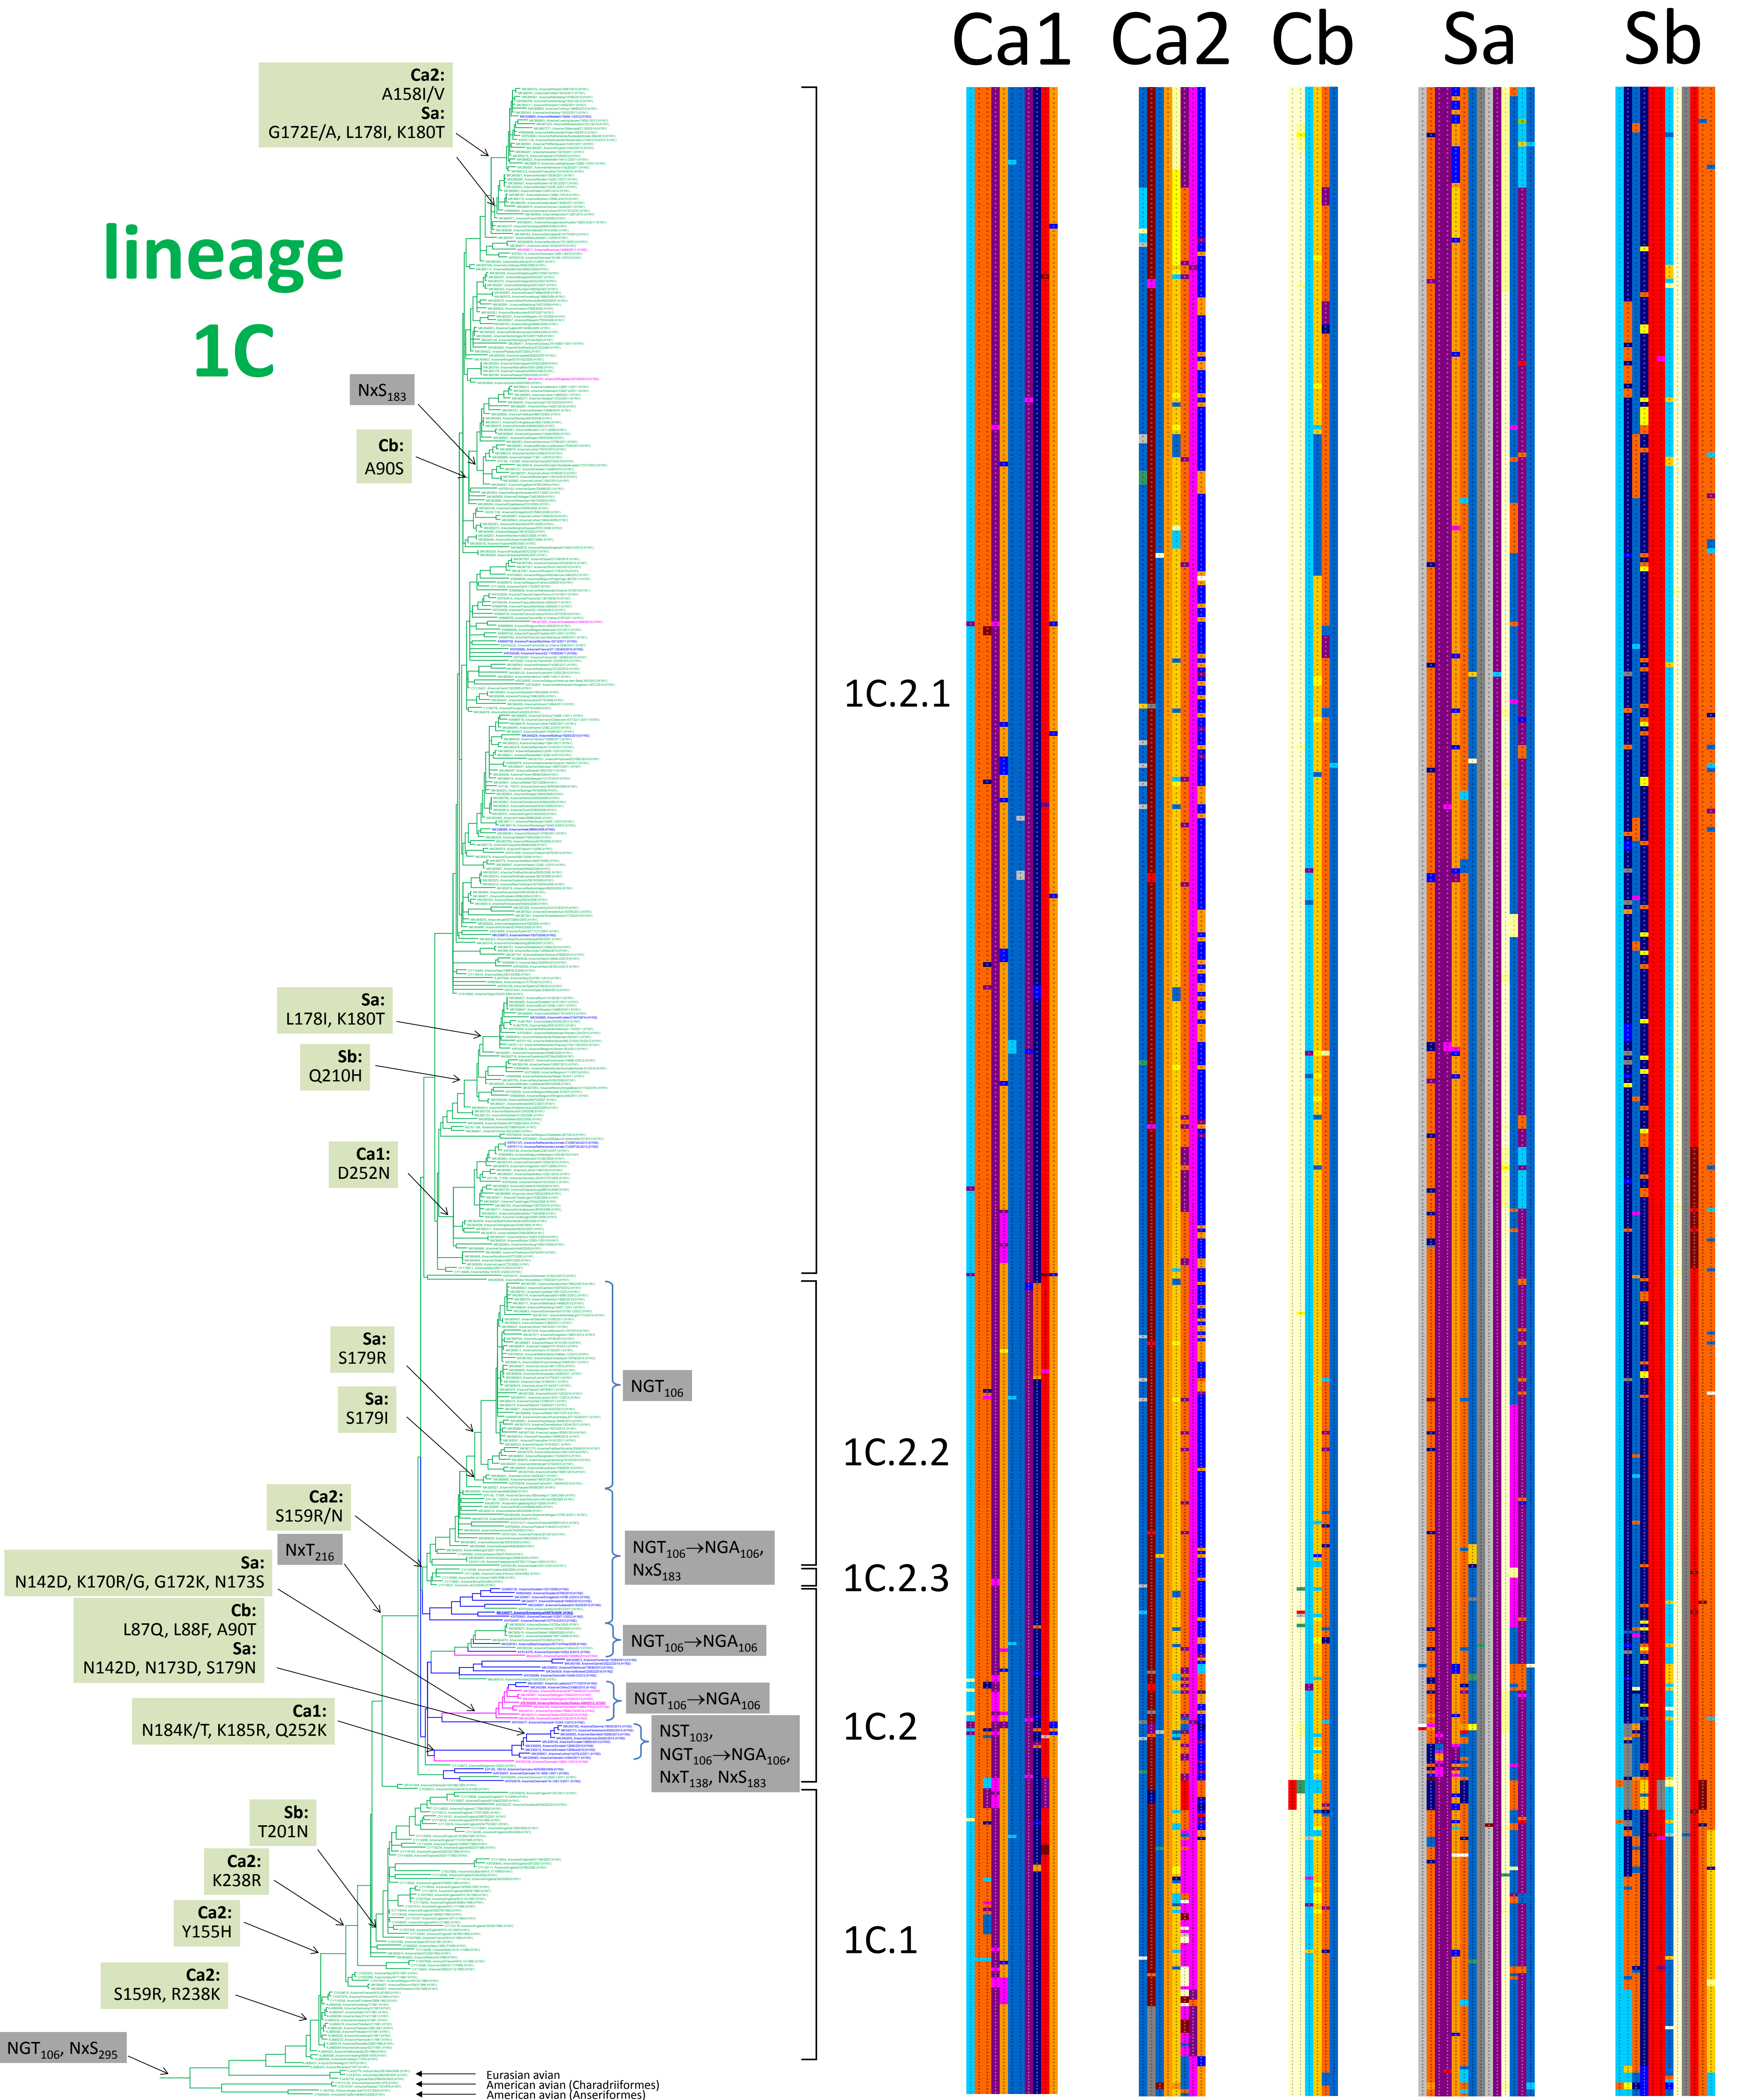

Supplement: s1 [file s1]

Suppl. Fig. 1

HAH1

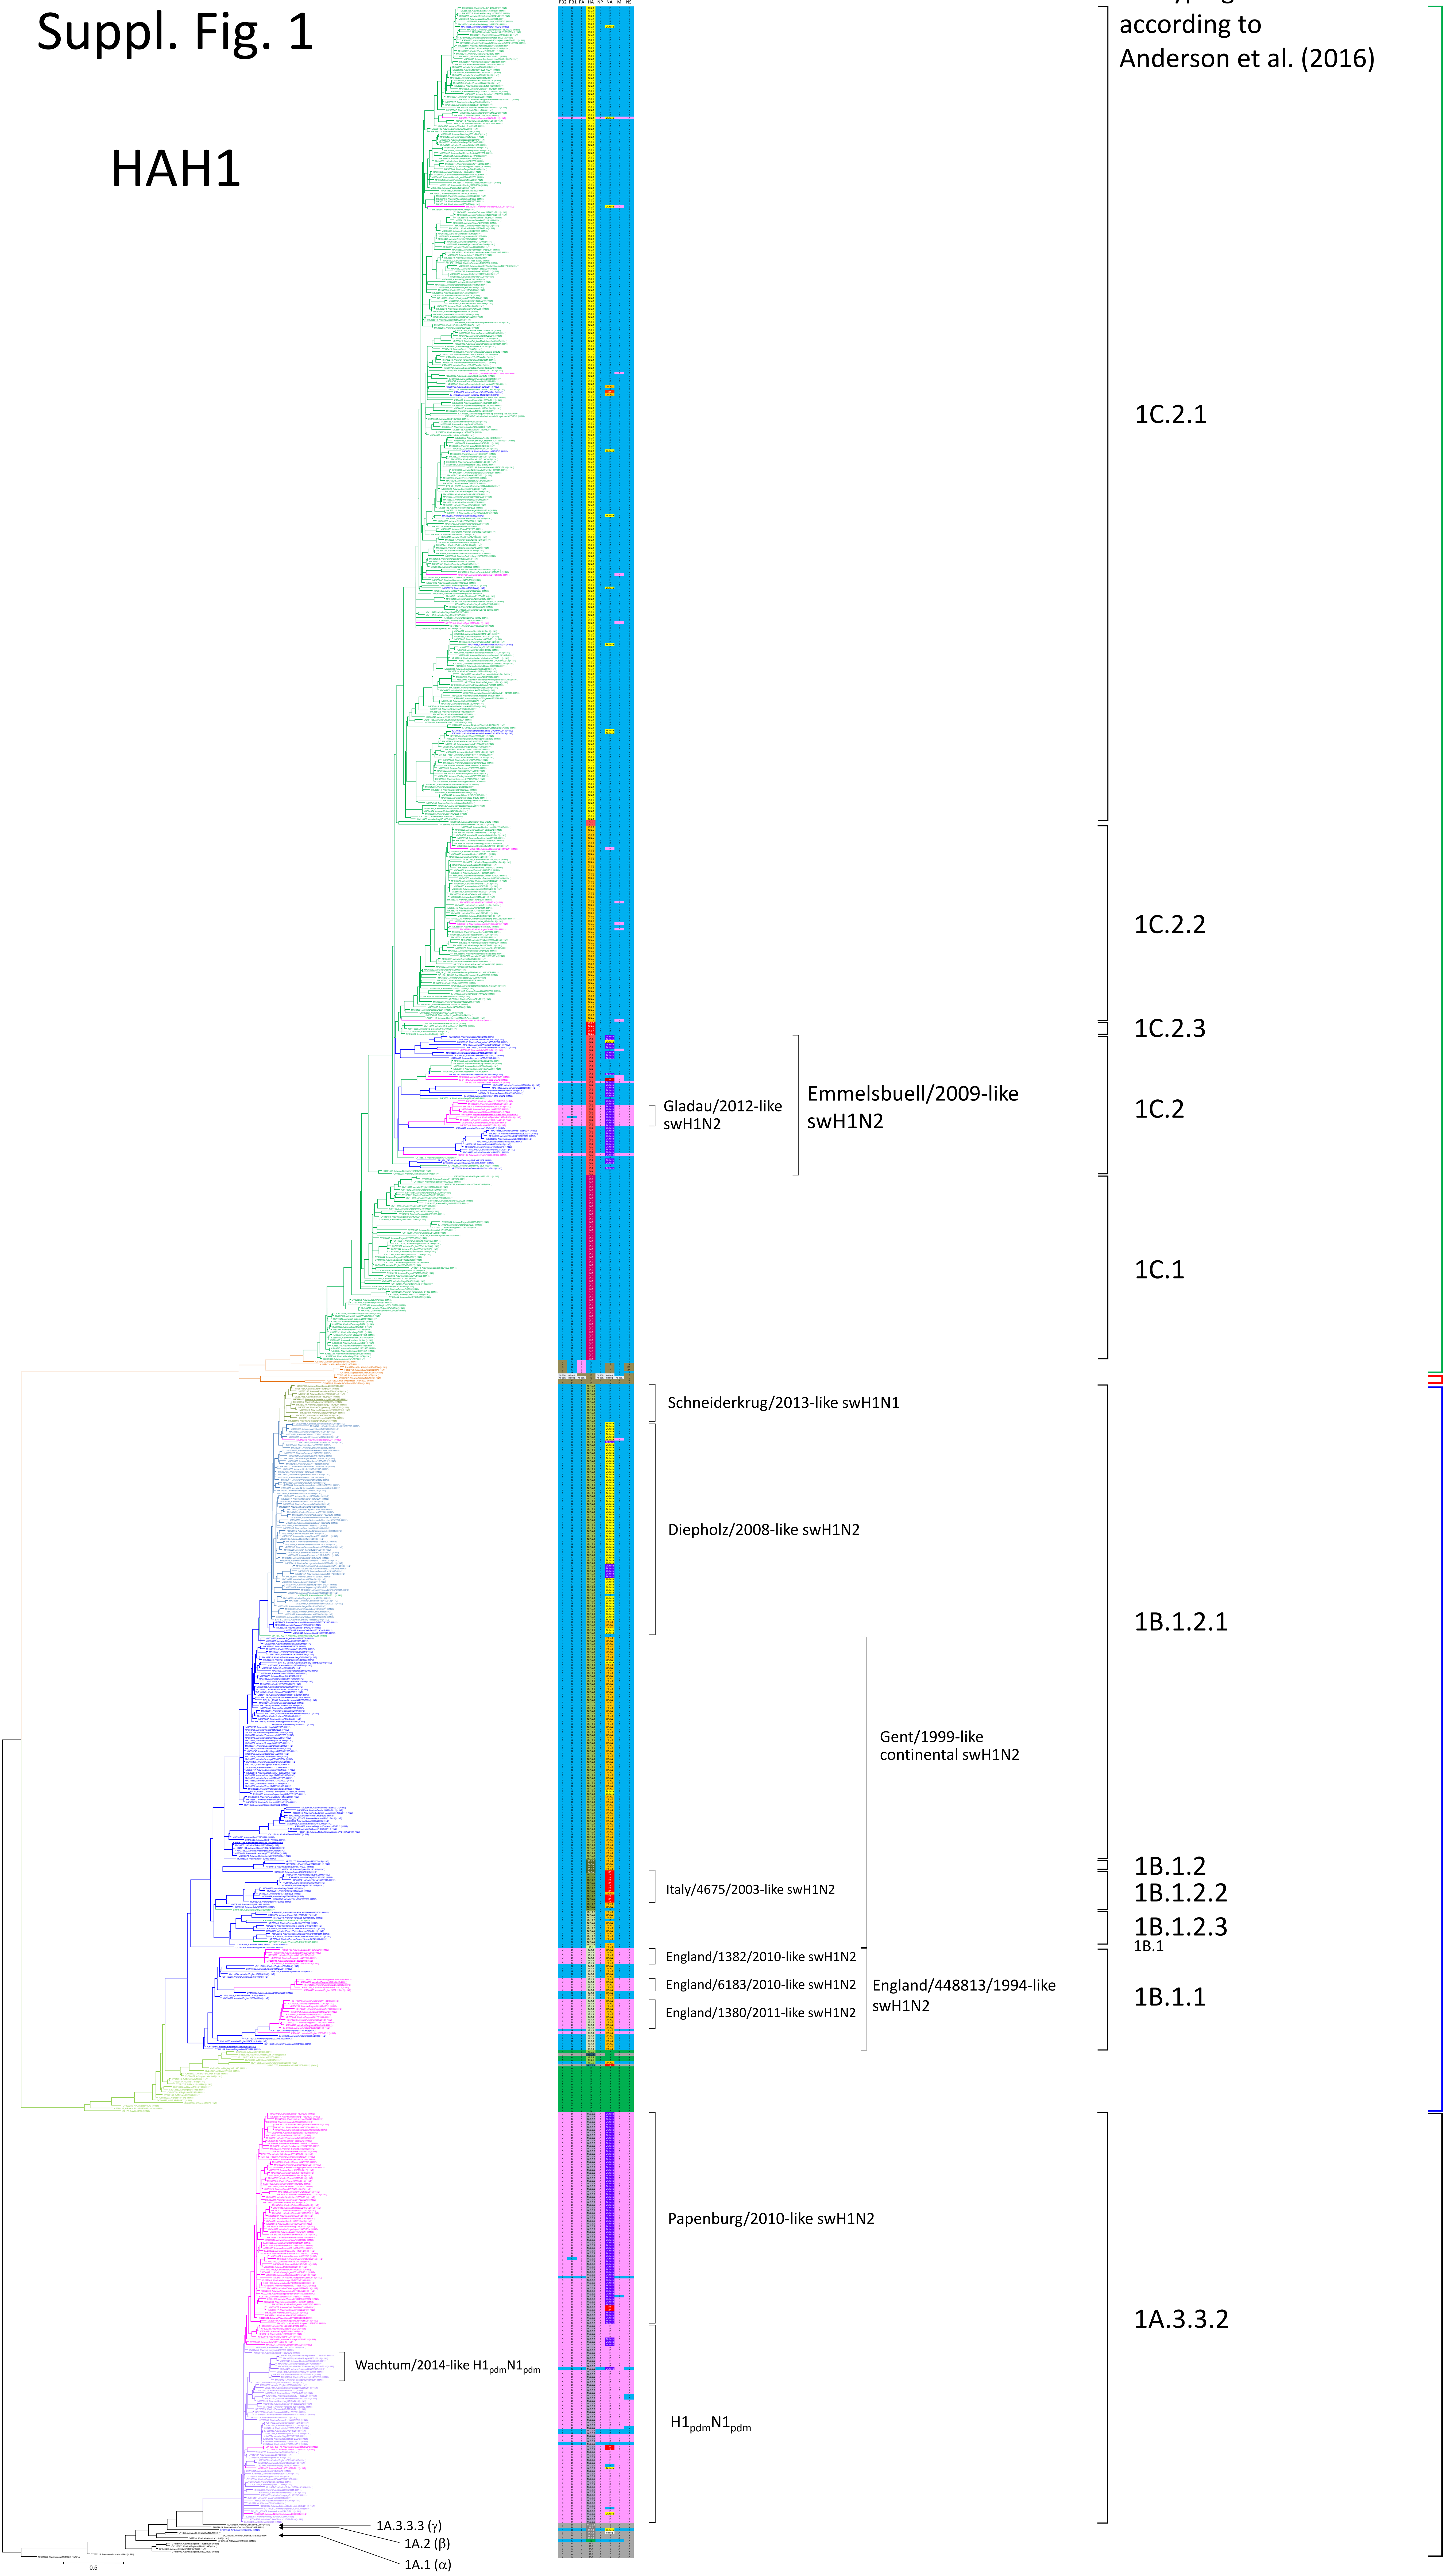

Lineage  
1C

Avian lineages

Lineage  
1B

Lineage  
1A

Supplement: s1 [file s1]

Suppl. Fig. 3

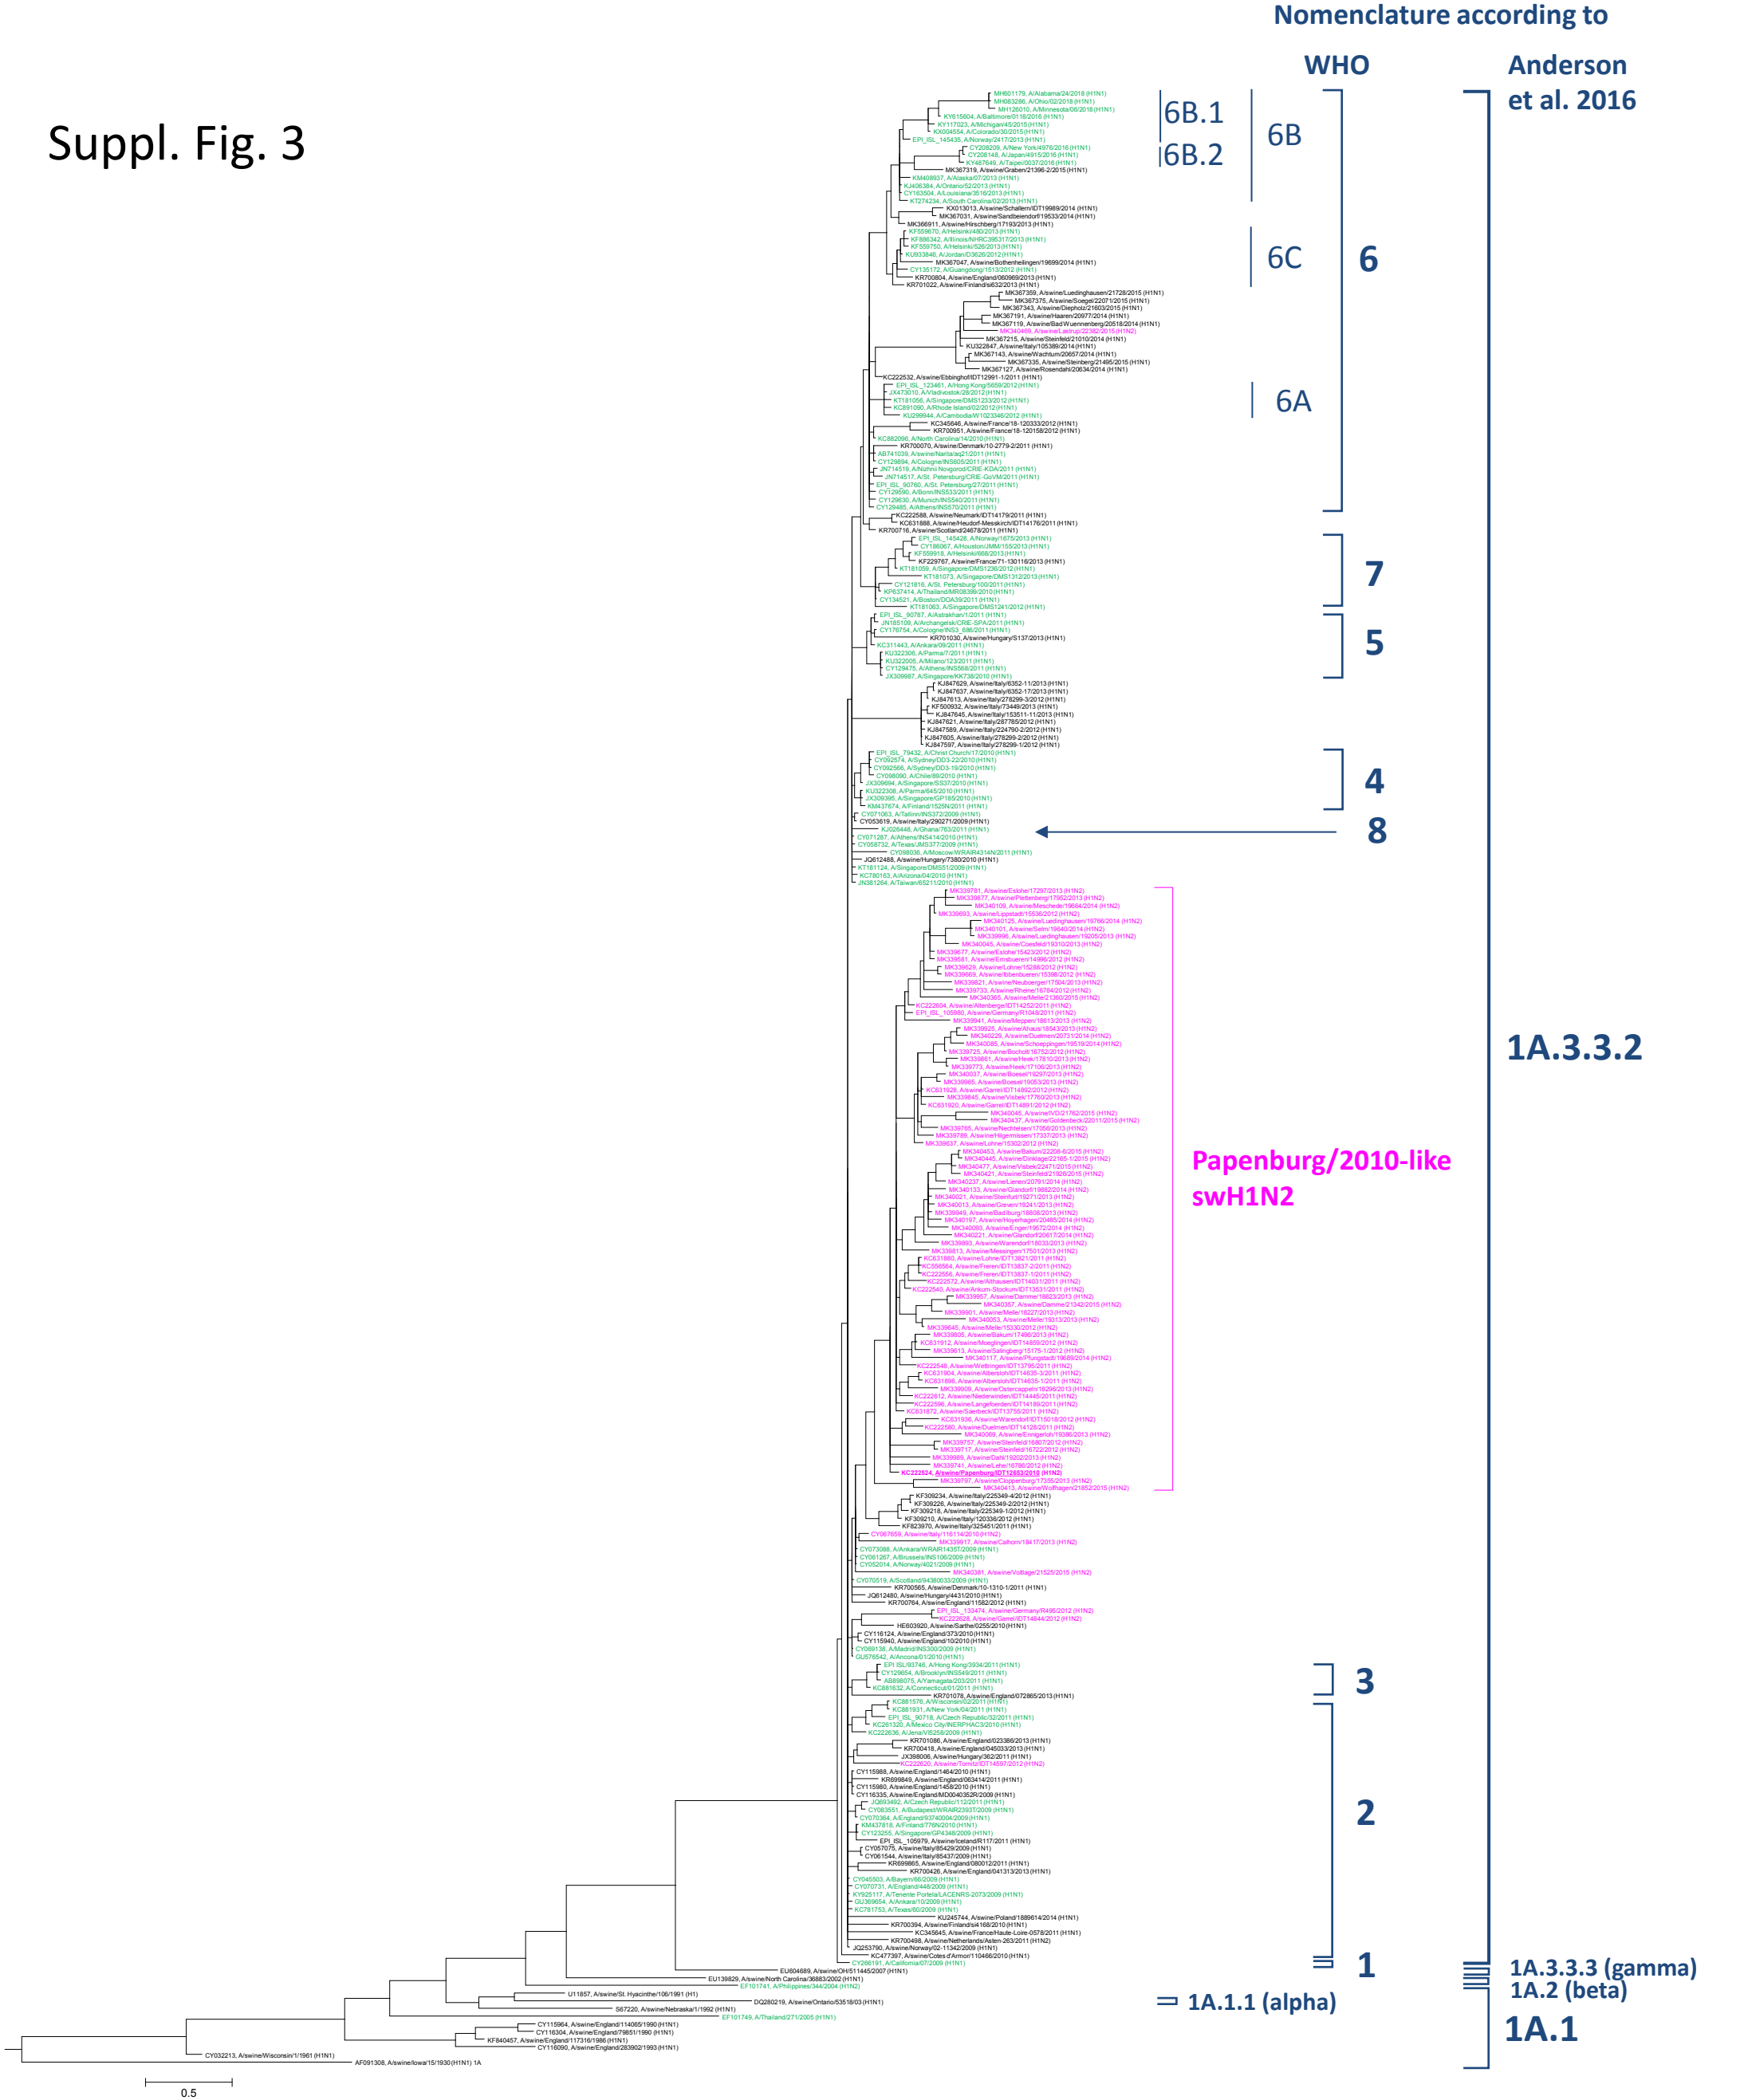

Supplement: s1 [file s1]

lineage  
1B

Sb

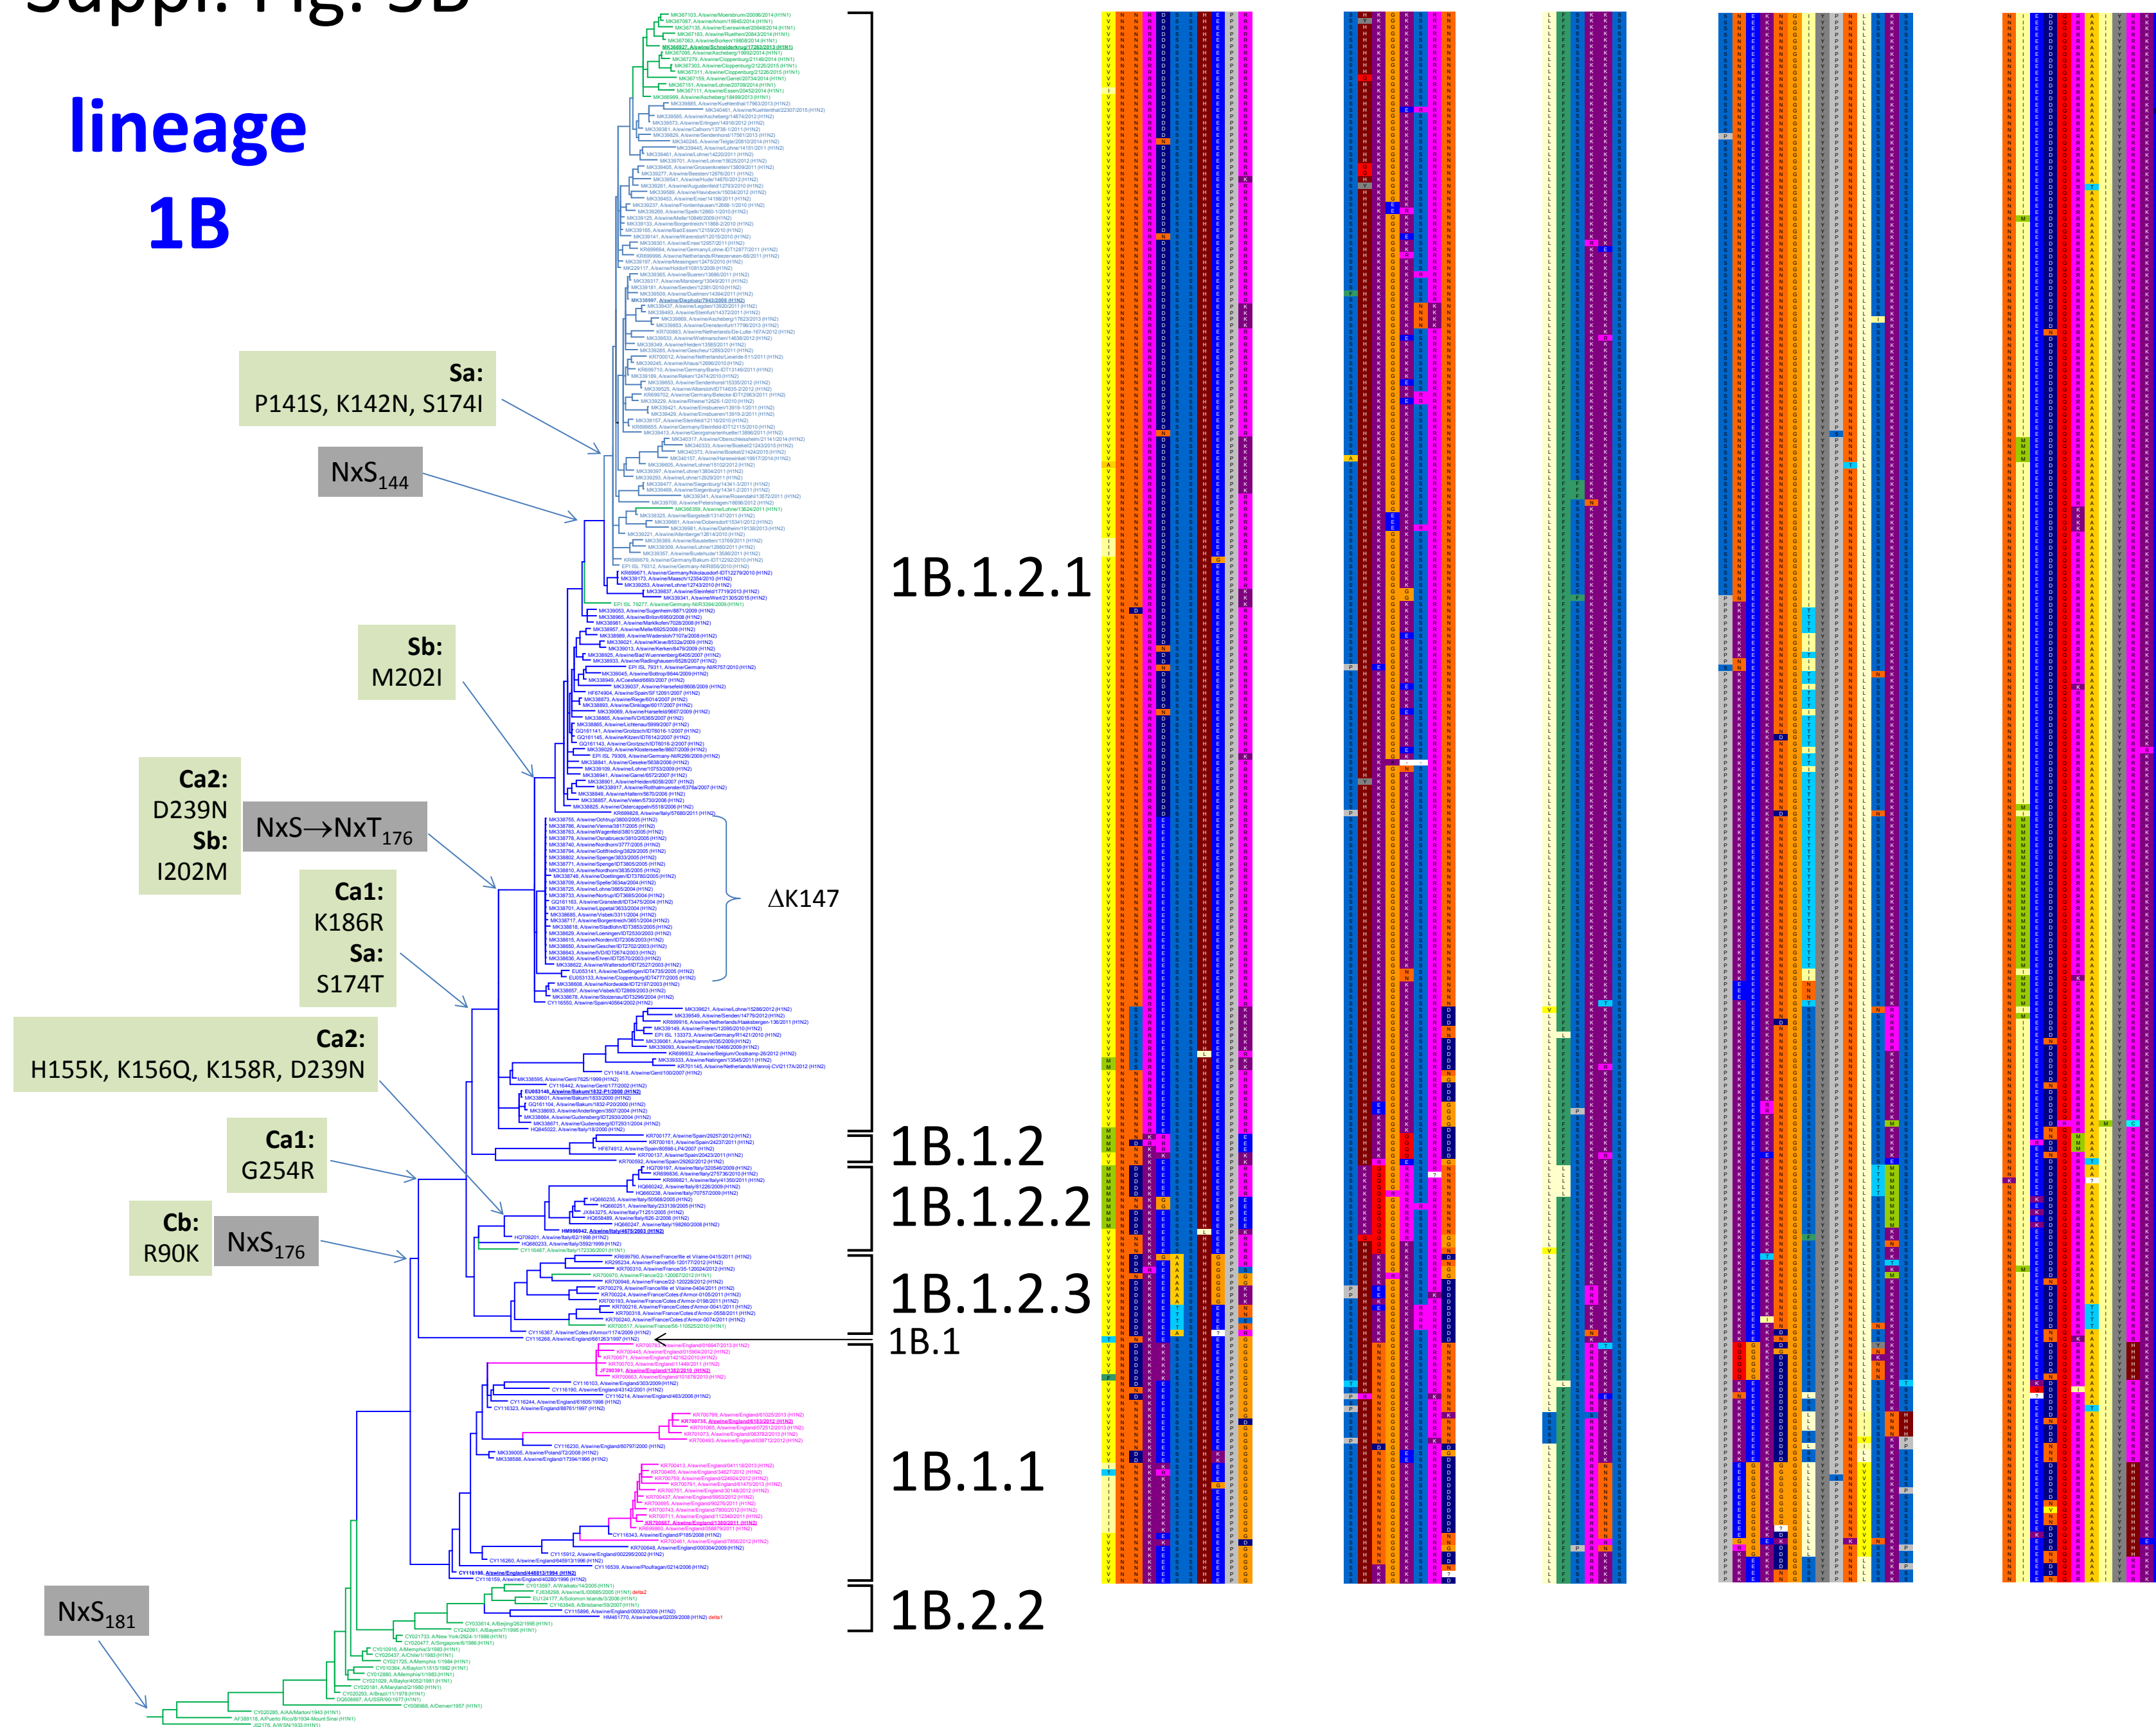

Supplement: s1 [file s1]

Suppl. Fig. 4

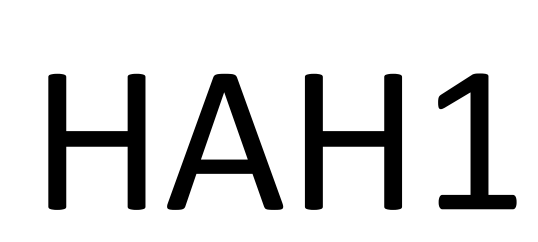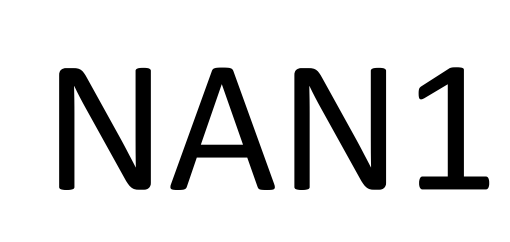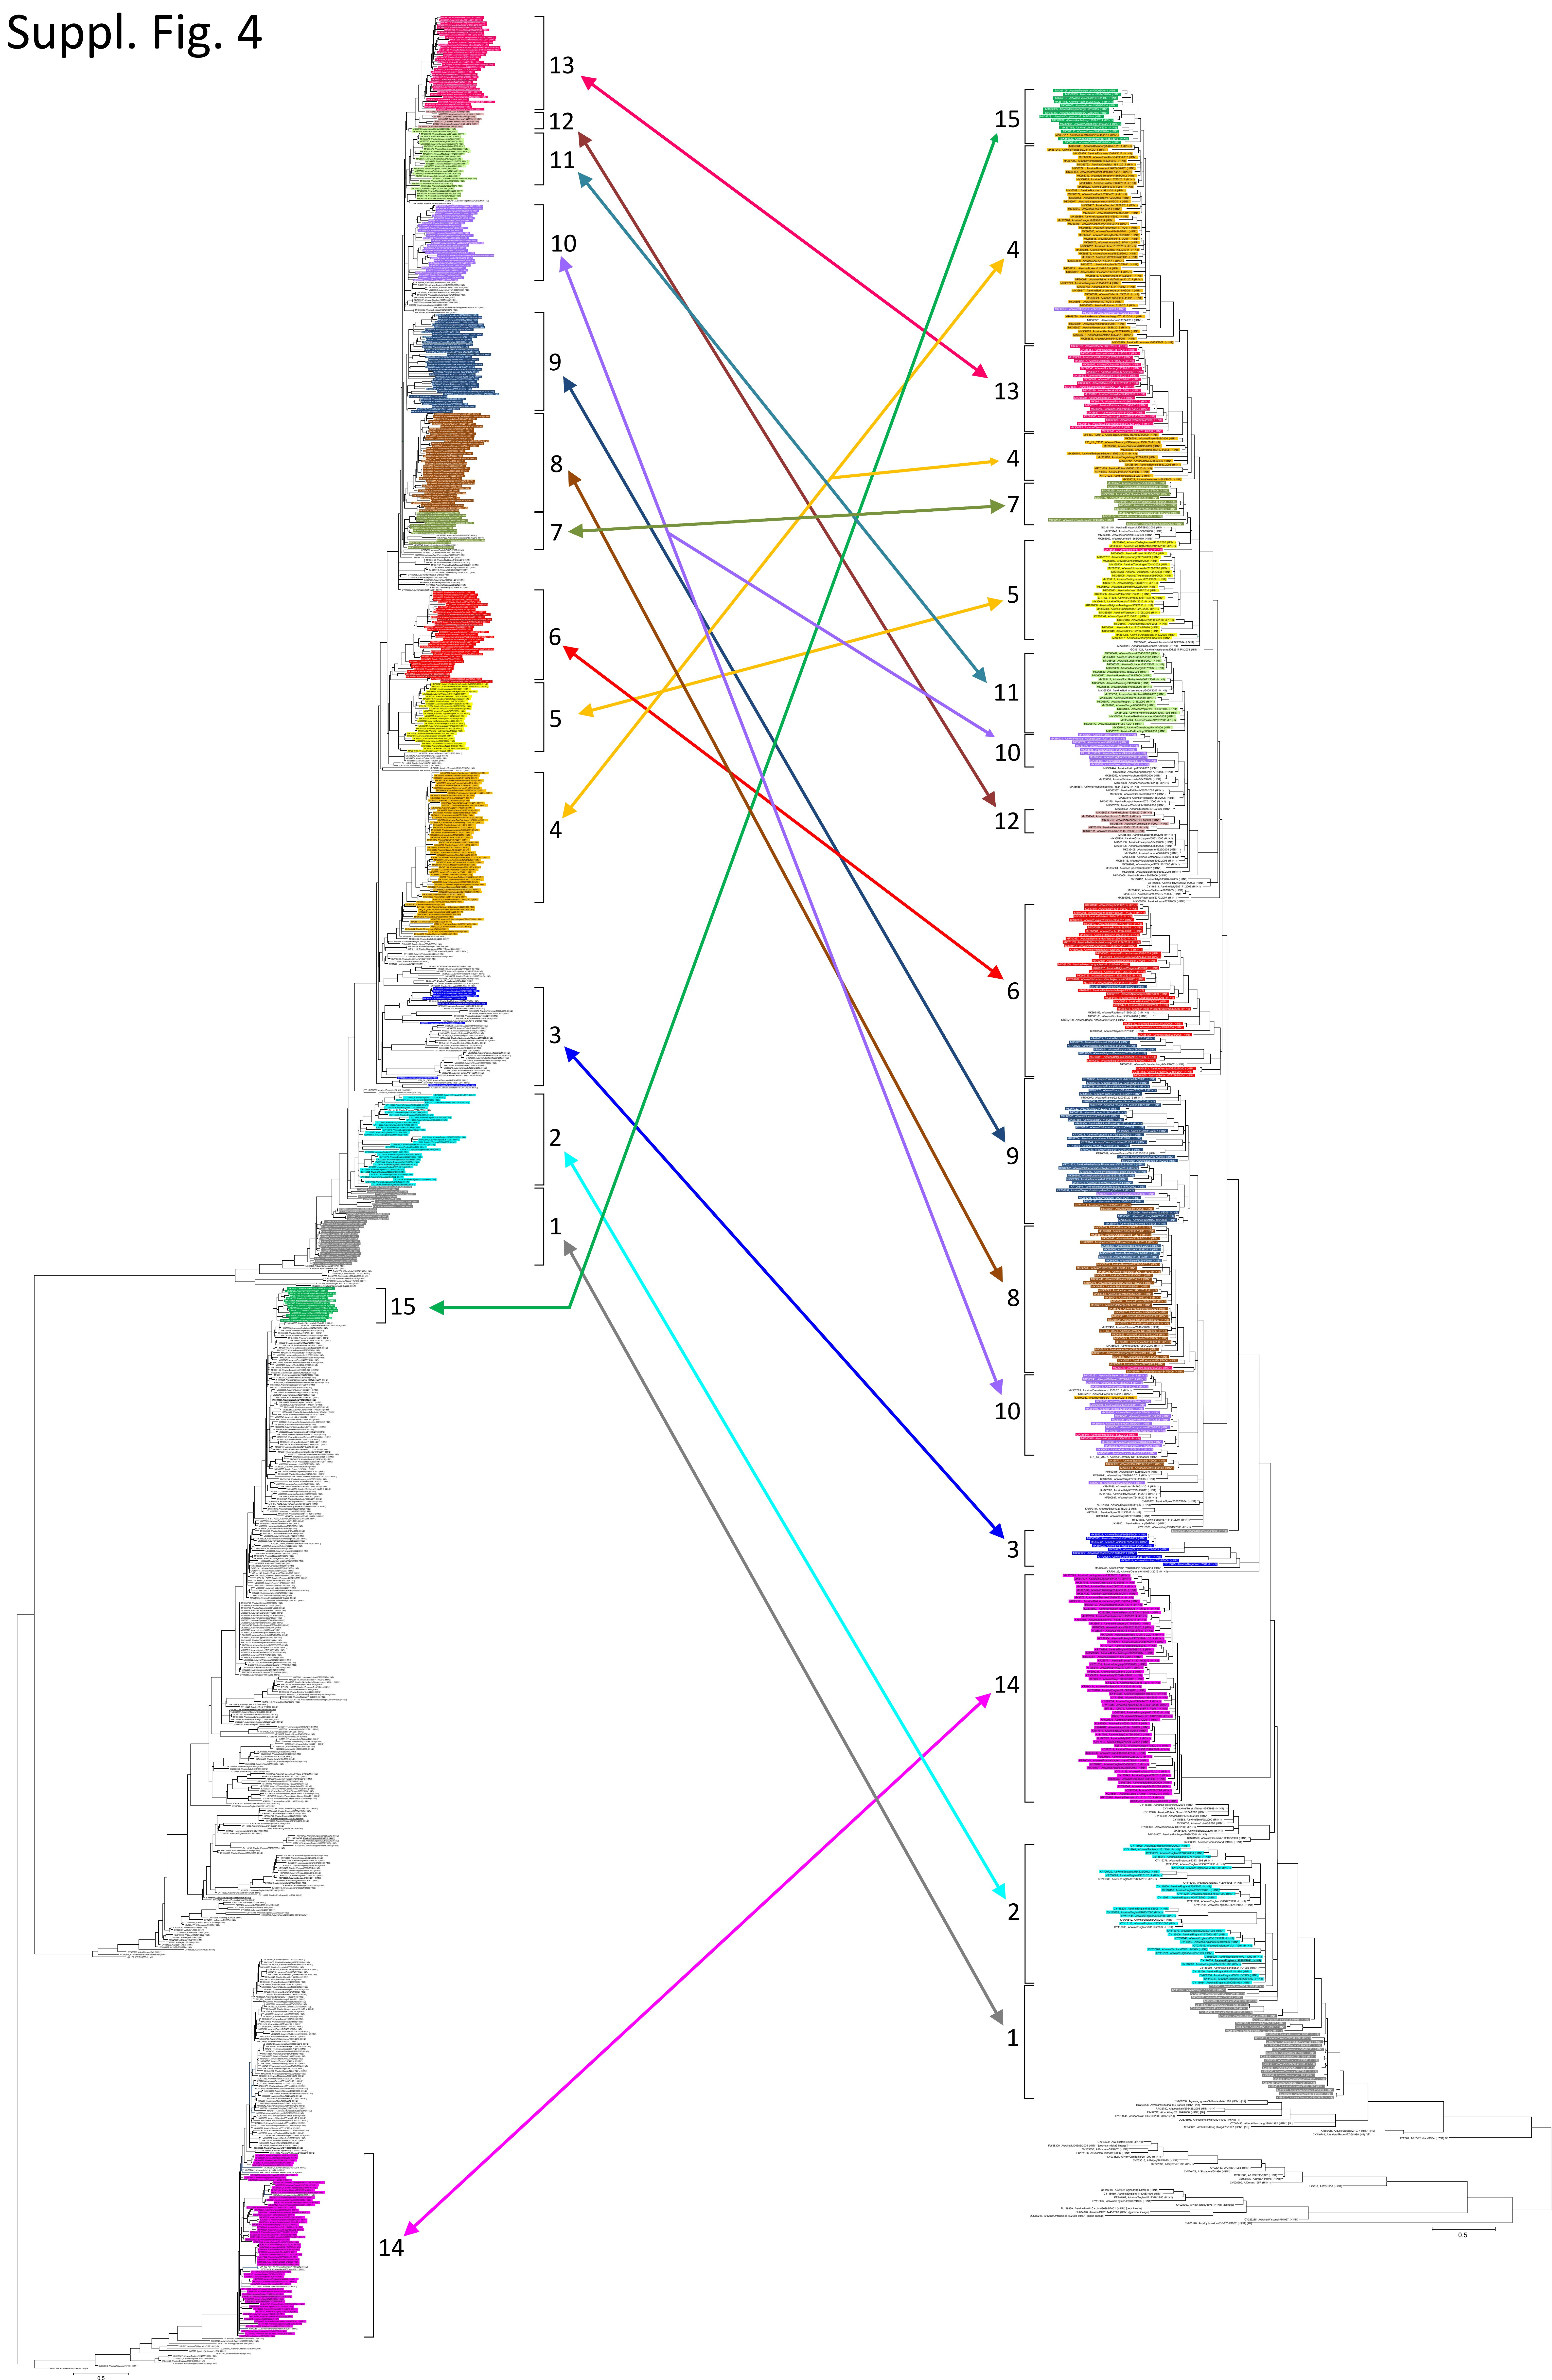

Supplement: s1 [file s1]
